# Supplementary material for: Synthesis of the biological repeating unit of Streptococcus pneumoniae serotype 23F capsular polysaccharide
Source: Royal Society of Chemistry journal article supplement (doi:10.1039/c6ob02363k), 2016-01-01
Supplement: c6ob02363k1.pdf [file c6ob02363k1.pdf]

## Supporting Information

### Synthesis of the biological repeating unit of *Streptococcus pneumoniae* serotype 23F capsular polysaccharide

Kang Yu,<sup>a</sup> Yin Qiao,<sup>a</sup> Guofeng Gu,<sup>a,\*</sup> Jian Gao,<sup>a</sup> Shuihong Cai,<sup>b</sup> Zhongzhu Long,<sup>b</sup> and Zhongwu Guo<sup>c,\*</sup>

a) National Glycoengineering Research Center and Shandong Provincial Key Laboratory of Carbohydrate Chemistry and Glycobiology, Shandong University, Jinan 250100, China

b) Qidong Dongyue Pharmaceutical Co., Ltd., Qidong, Jiangsu Province 226221, China

c) Department of Chemistry, University of Florida, 214 Leigh Hall, Gainesville, Florida 32611, United States

\* Corresponding authors: [guofenggu@sdu.edu.cn](mailto:guofenggu@sdu.edu.cn), [zguo@chem.ufl.edu](mailto:zguo@chem.ufl.edu)

### Table of Contents

|                                                                          |      |
|--------------------------------------------------------------------------|------|
| Table of Contents-----                                                   | S1-2 |
| <sup>1</sup> H, <sup>13</sup> C NMR spectrum of compound <b>10</b> ----- | S3   |
| <sup>1</sup> H, <sup>13</sup> C NMR spectrum of compound <b>11</b> ----- | S4   |
| <sup>1</sup> H, <sup>13</sup> C NMR spectrum of compound <b>5</b> -----  | S5   |
| <sup>1</sup> H, <sup>13</sup> C NMR spectrum of compound <b>13</b> ----- | S6   |
| <sup>1</sup> H, <sup>13</sup> C NMR spectrum of compound <b>14</b> ----- | S7   |
| <sup>1</sup> H, <sup>13</sup> C NMR spectrum of compound <b>6</b> -----  | S6   |
| <sup>1</sup> H, <sup>13</sup> C NMR spectrum of compound <b>15</b> ----- | S9   |
| gCOSY, gHSQC spectrum of compound <b>15</b> -----                        | S10  |
| <sup>1</sup> H, <sup>13</sup> C NMR spectrum of compound <b>16</b> ----- | S11  |
| gCOSY, gHSQC spectrum of compound <b>16</b> -----                        | S12  |
| <sup>1</sup> H-coupled gHSQC spectrum of compound <b>16</b> -----        | S13  |
| <sup>1</sup> H, <sup>13</sup> C NMR spectrum of compound <b>17</b> ----- | S14  |
| gCOSY, gHSQC spectrum of compound <b>17</b> -----                        | S15  |
| <sup>1</sup> H, <sup>13</sup> C NMR spectrum of compound <b>18</b> ----- | S16  |
| gCOSY, gHSQC spectrum of compound <b>18</b> -----                        | S17  |
| <sup>1</sup> H, <sup>13</sup> C NMR spectrum of compound <b>19</b> ----- | S18  |
| gCOSY, gHSQC spectrum of compound <b>19</b> -----                        | S19  |

|                                                                          |     |
|--------------------------------------------------------------------------|-----|
| <sup>1</sup> H, <sup>13</sup> C NMR spectrum of compound <b>20</b> ----- | S20 |
| gCOSY, gHSQC spectrum of compound <b>20</b> -----                        | S21 |
| <sup>1</sup> H, <sup>13</sup> C NMR spectrum of compound <b>21</b> ----- | S22 |
| gCOSY, gHSQC spectrum of compound <b>21</b> -----                        | S23 |
| <sup>1</sup> H-coupled gHSQC spectrum of compound <b>21</b> -----        | S24 |
| <sup>1</sup> H, <sup>13</sup> C NMR spectrum of compound <b>22</b> ----- | S25 |
| gCOSY, gHSQC spectrum of compound <b>22</b> -----                        | S26 |
| <sup>1</sup> H, <sup>13</sup> C NMR spectrum of compound <b>3</b> -----  | S27 |
| gCOSY, gHSQC spectrum of compound <b>3</b> -----                         | S28 |
| <sup>1</sup> H, <sup>13</sup> C NMR spectrum of compound <b>23</b> ----- | S29 |
| gCOSY, gHSQC spectrum of compound <b>23</b> -----                        | S30 |
| <sup>31</sup> P NMR spectrum of compound <b>23</b> -----                 | S31 |
| <sup>1</sup> H, <sup>13</sup> C NMR spectrum of compound <b>2</b> -----  | S32 |
| gCOSY, gHSQC spectrum of compound <b>2</b> -----                         | S33 |
| <sup>31</sup> P NMR spectrum of compound <b>2</b> -----                  | S34 |
| ESI-TOF HRMS spectrum of compound <b>2</b> -----                         | S34 |

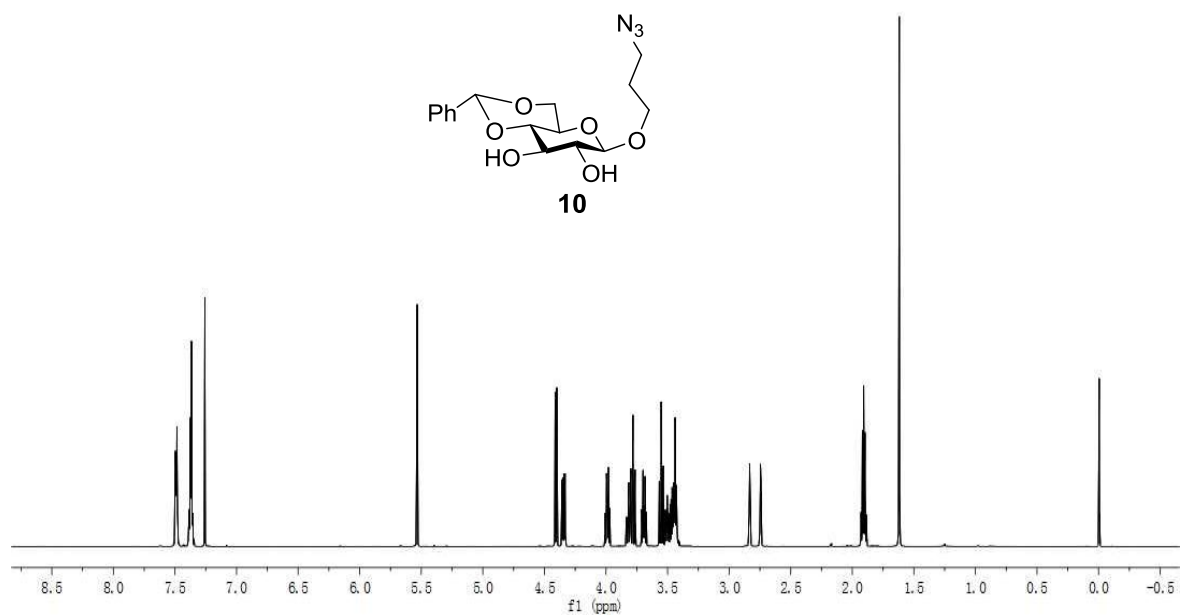

$^1\text{H}$  NMR spectrum of compound **10** (600 MHz,  $\text{CDCl}_3$ , 25 °C)

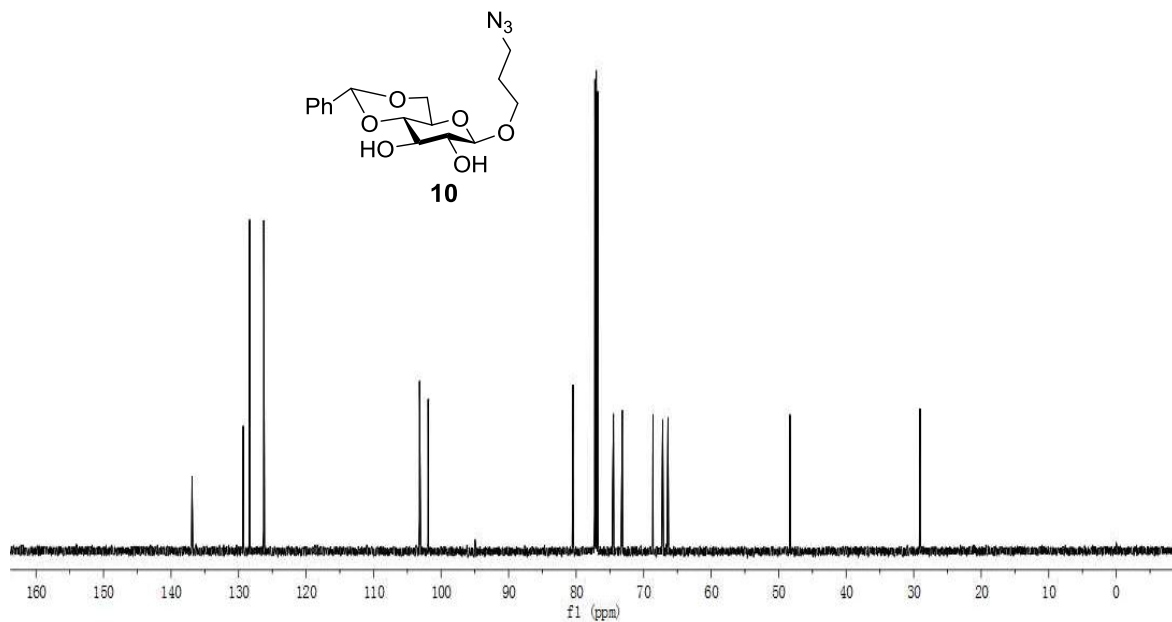

$^{13}\text{C}$  NMR spectrum of compound **10** (150 MHz,  $\text{CDCl}_3$ , 25 °C)

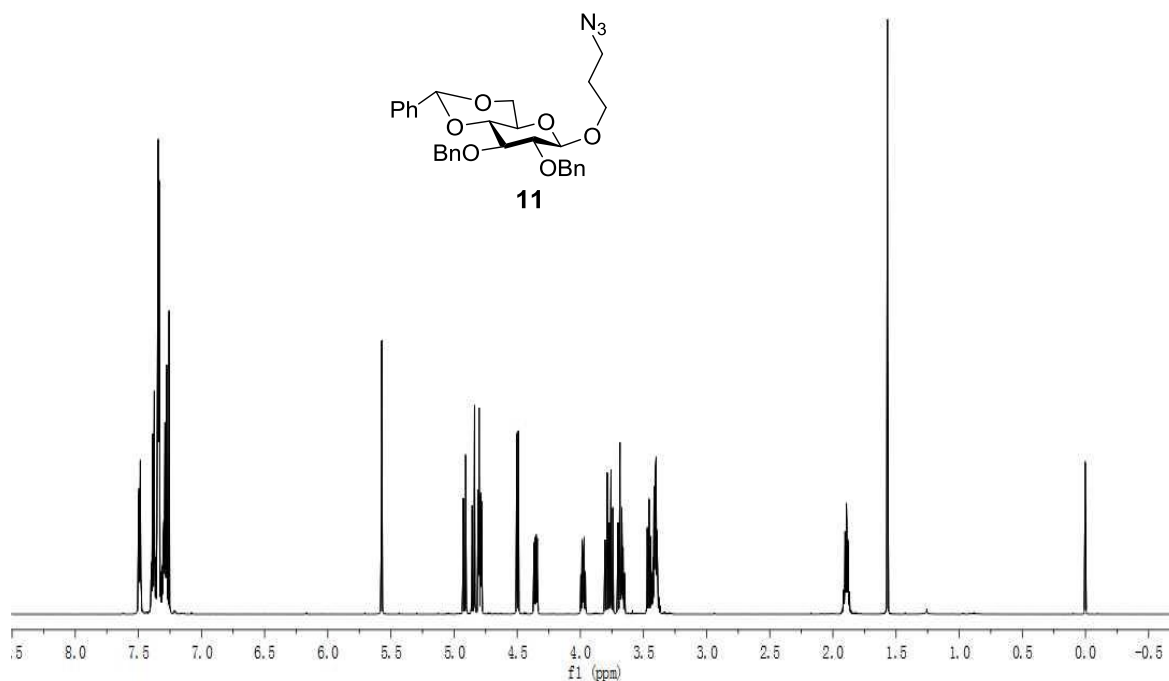

<sup>1</sup>H NMR spectrum of compound **11** (600 MHz, CDCl<sub>3</sub>, 25 °C)

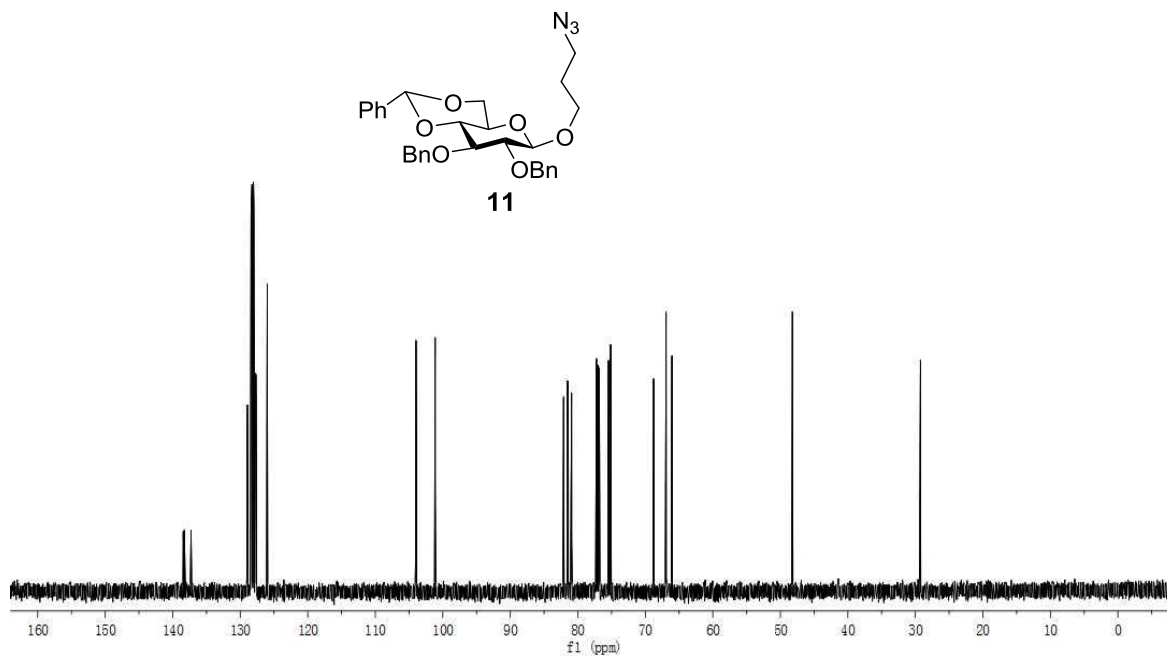

<sup>13</sup>C NMR spectrum of compound **11** (150 MHz, CDCl<sub>3</sub>, 25 °C)

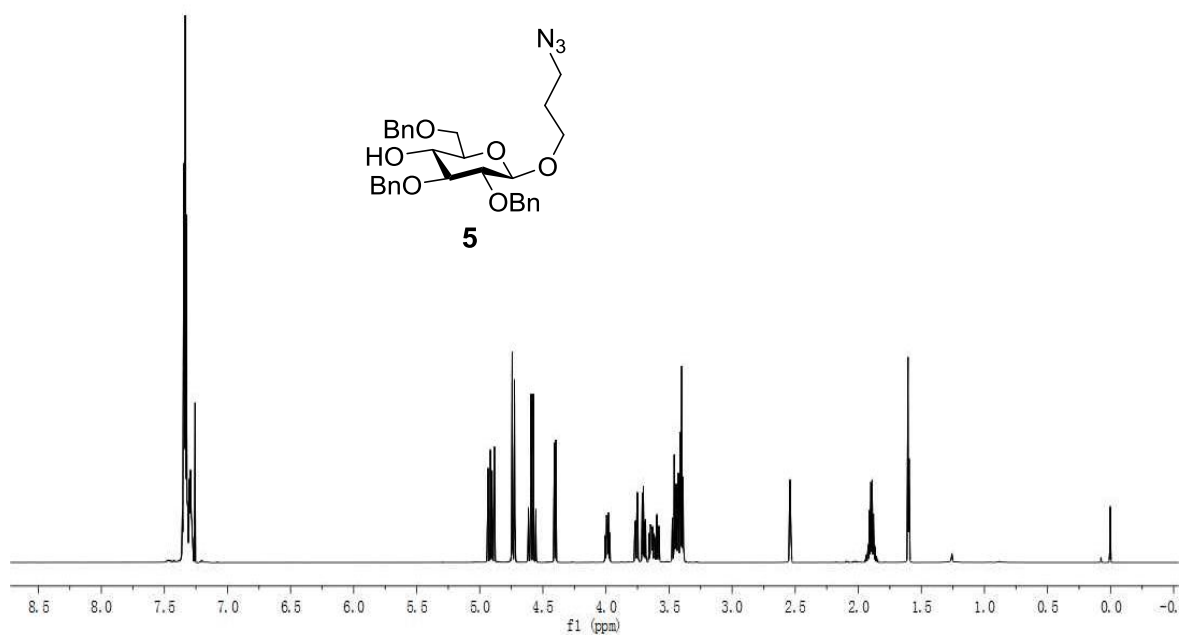

$^1\text{H}$  NMR spectrum of compound **5** (600 MHz,  $\text{CDCl}_3$ , 25 °C)

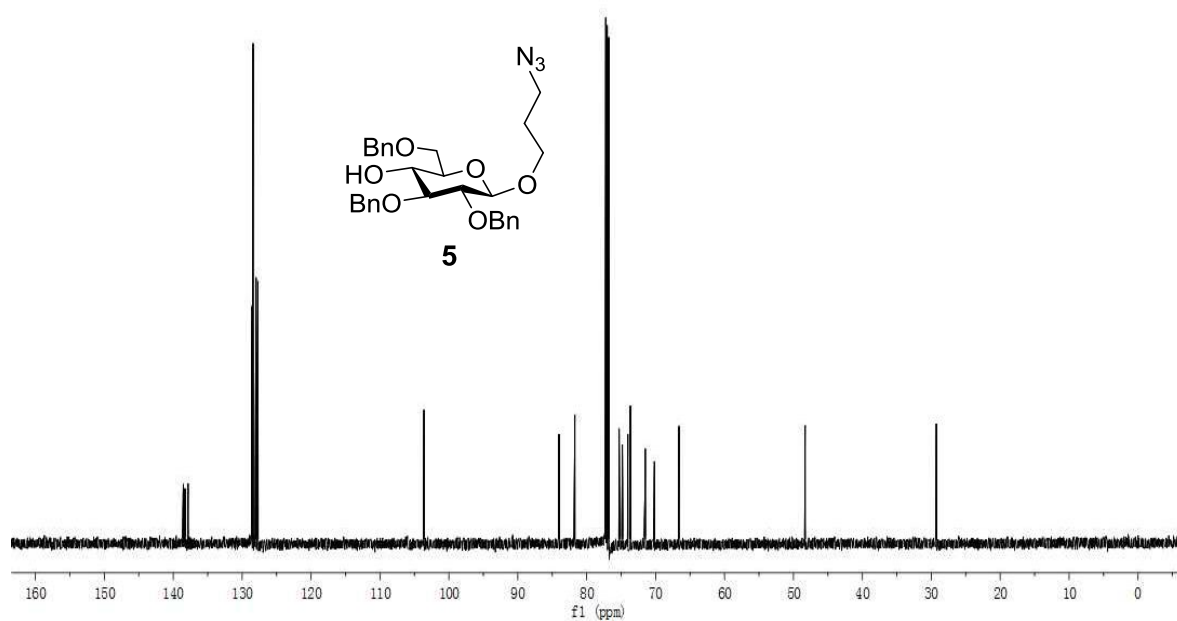

$^{13}\text{C}$  NMR spectrum of compound **5** (150 MHz,  $\text{CDCl}_3$ , 25 °C)

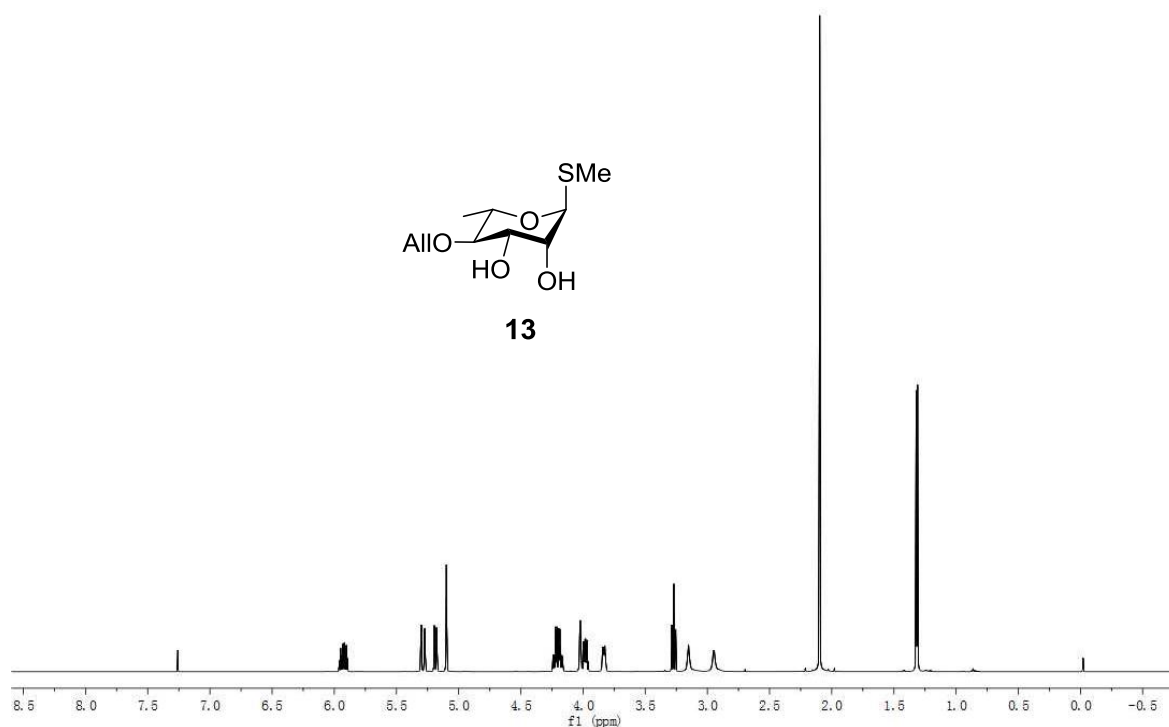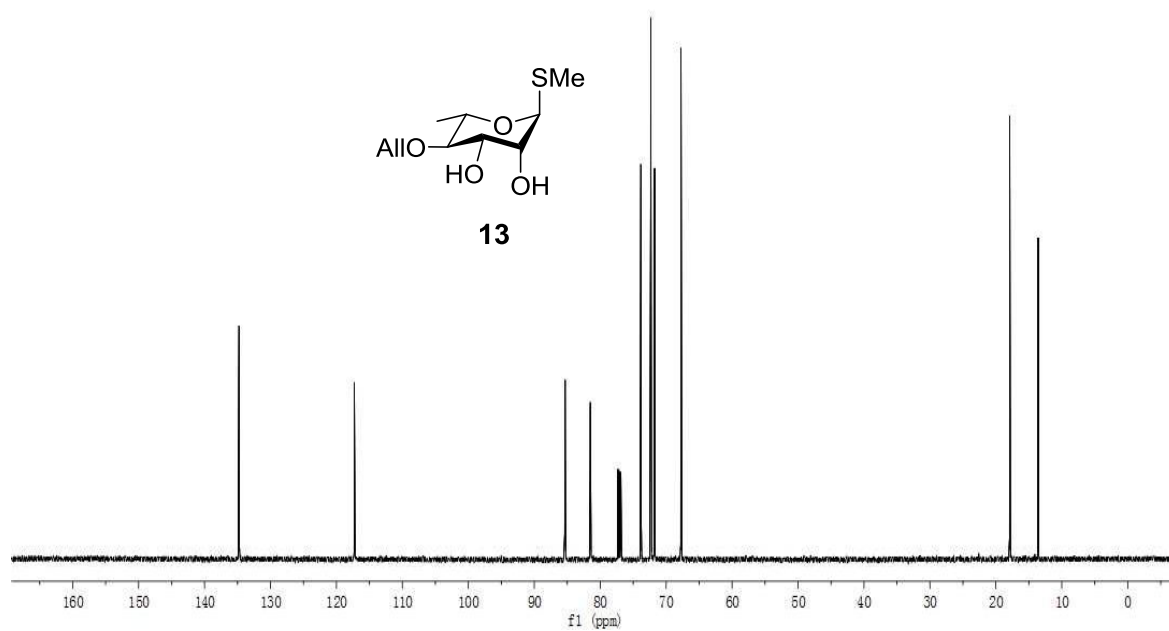

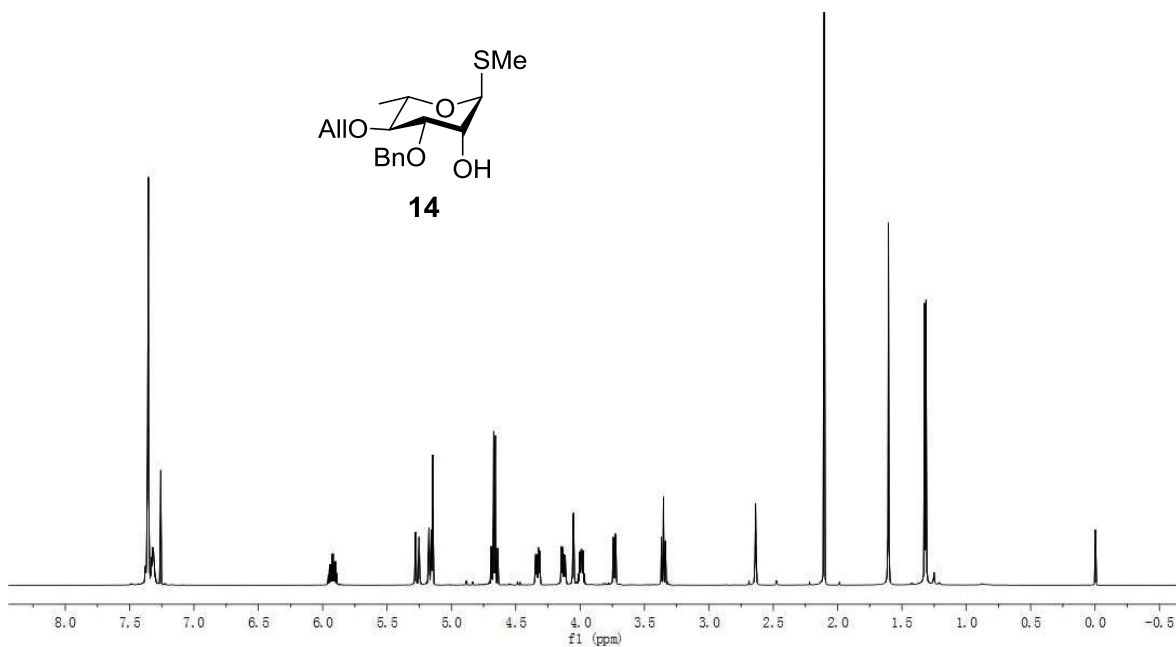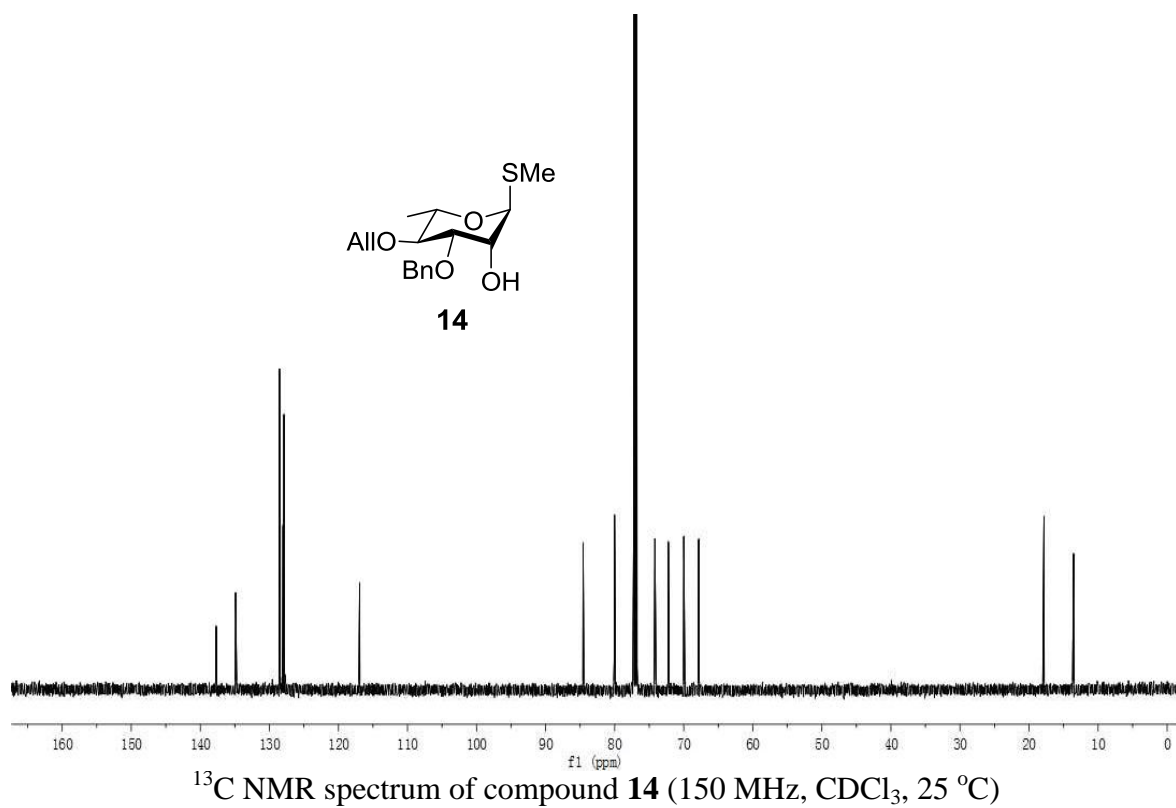

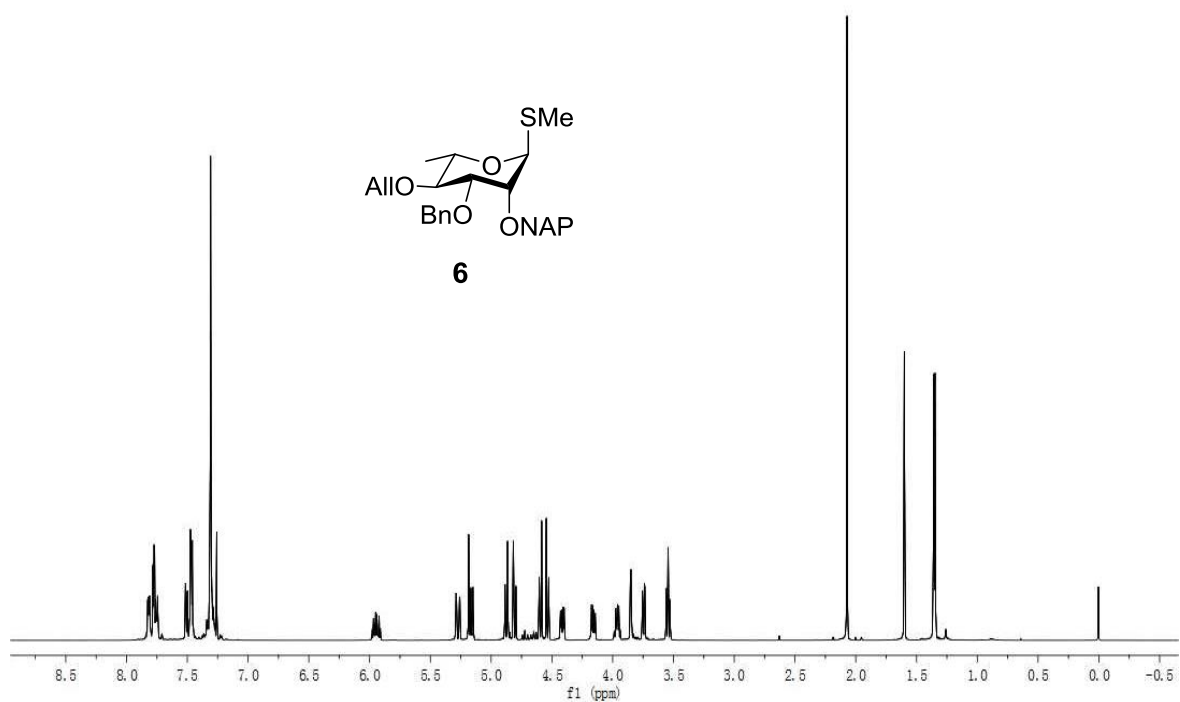

$^1\text{H}$  NMR spectrum of compound **6** (600 MHz,  $\text{CDCl}_3$ , 25 °C)

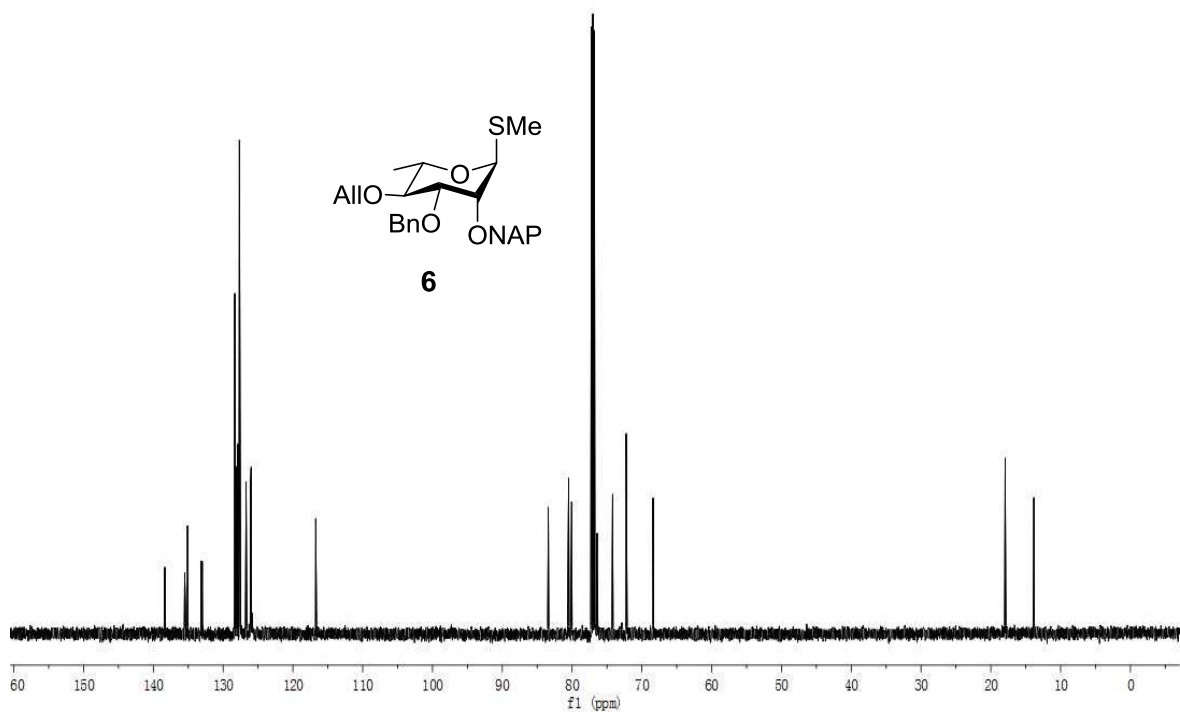

$^{13}\text{C}$  NMR spectrum of compound **6** (150 MHz,  $\text{CDCl}_3$ , 25 °C)



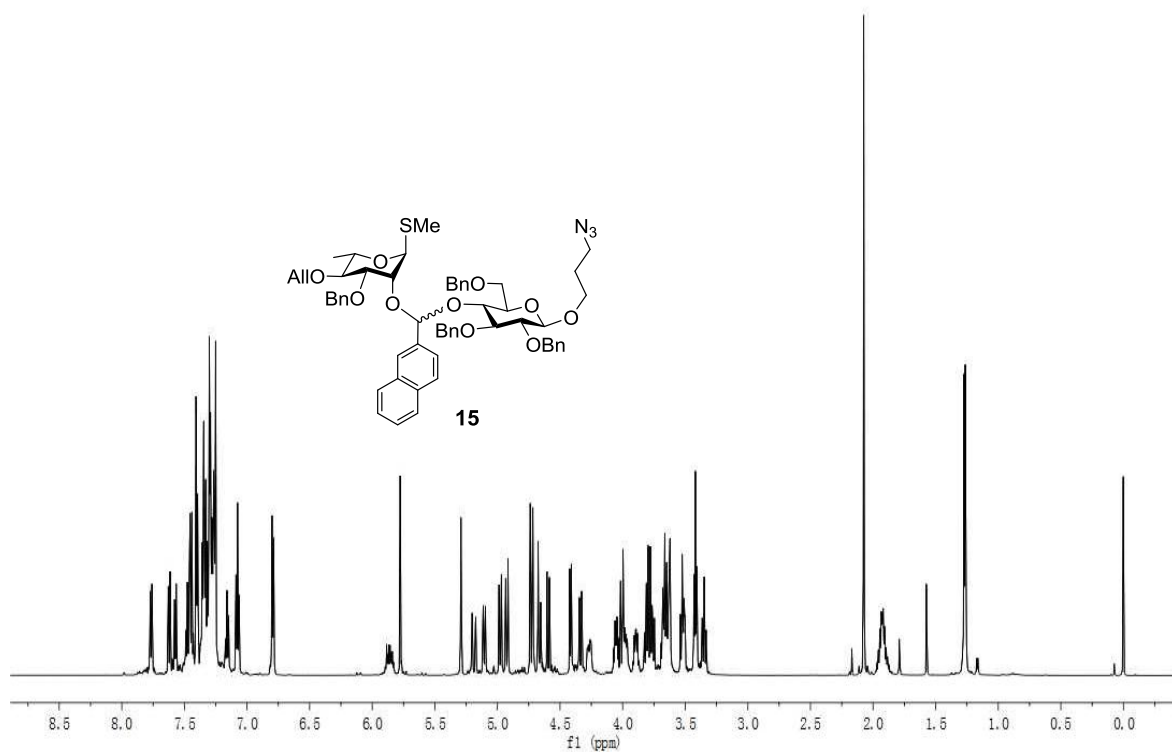

$^1\text{H}$  NMR spectrum of compound **15** (600 MHz,  $\text{CDCl}_3$ , 25 °C)

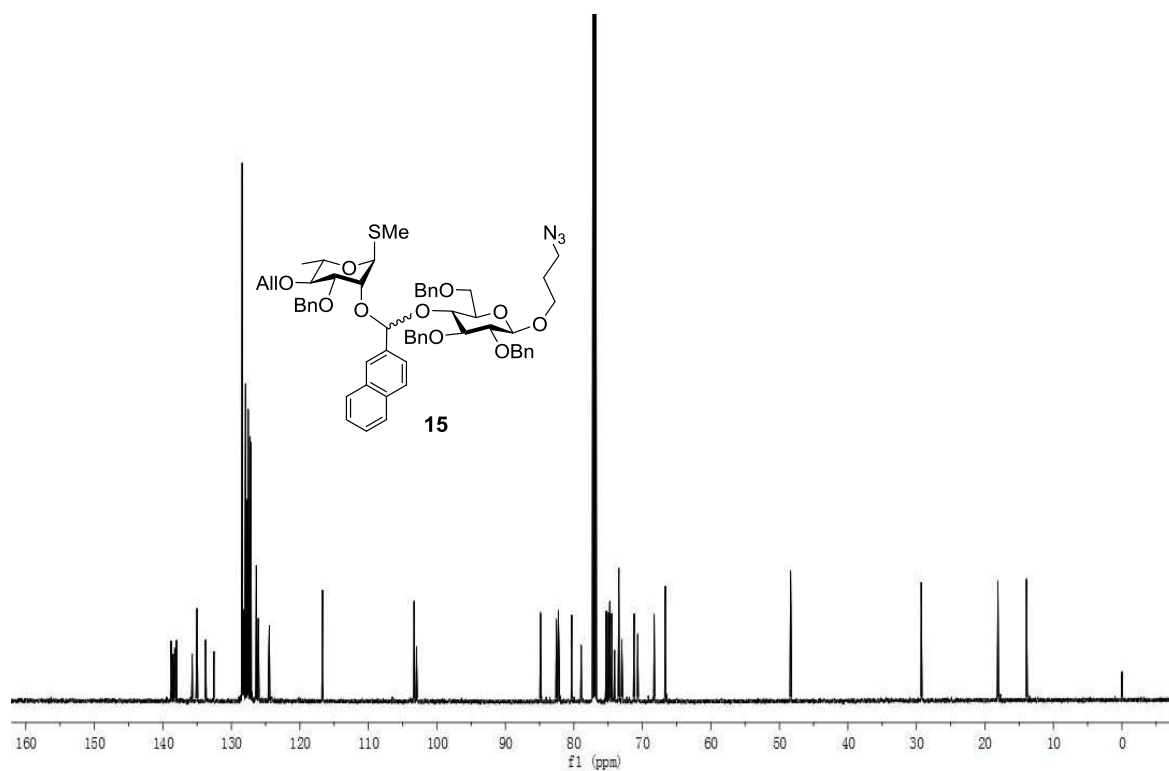

$^{13}\text{C}$  NMR spectrum of compound **15** (150 MHz,  $\text{CDCl}_3$ , 25 °C)

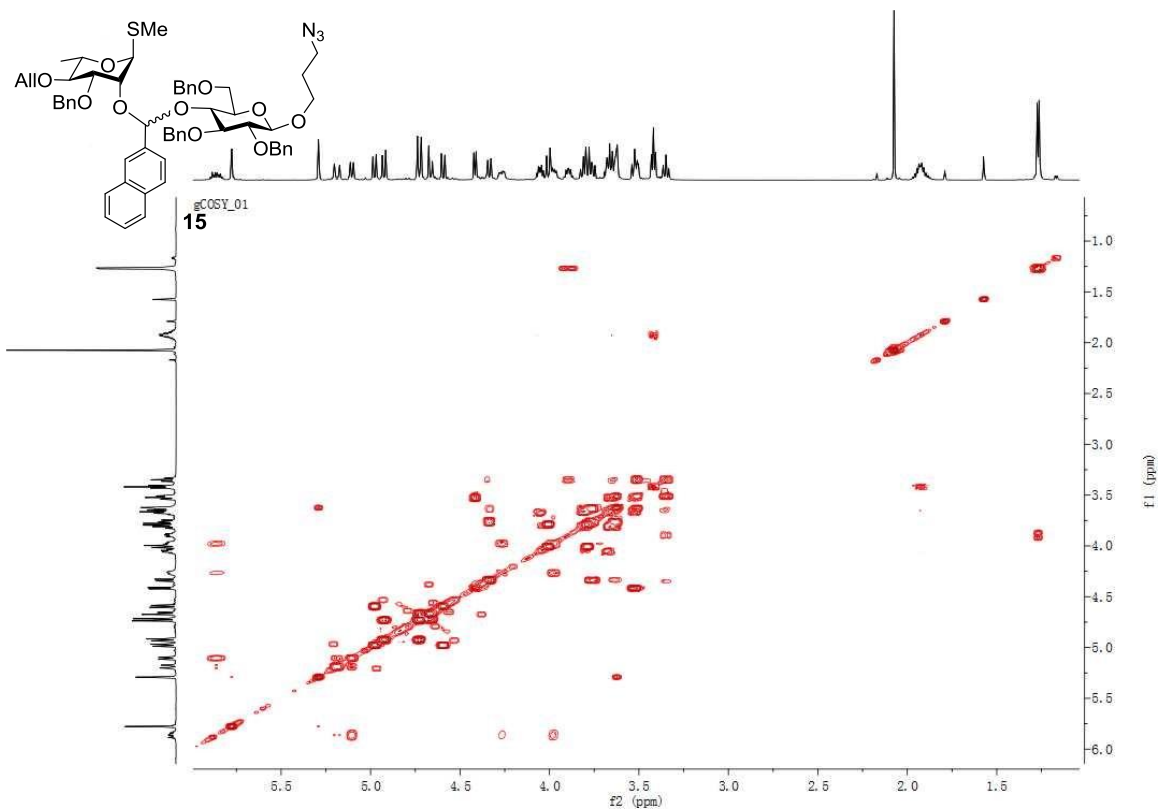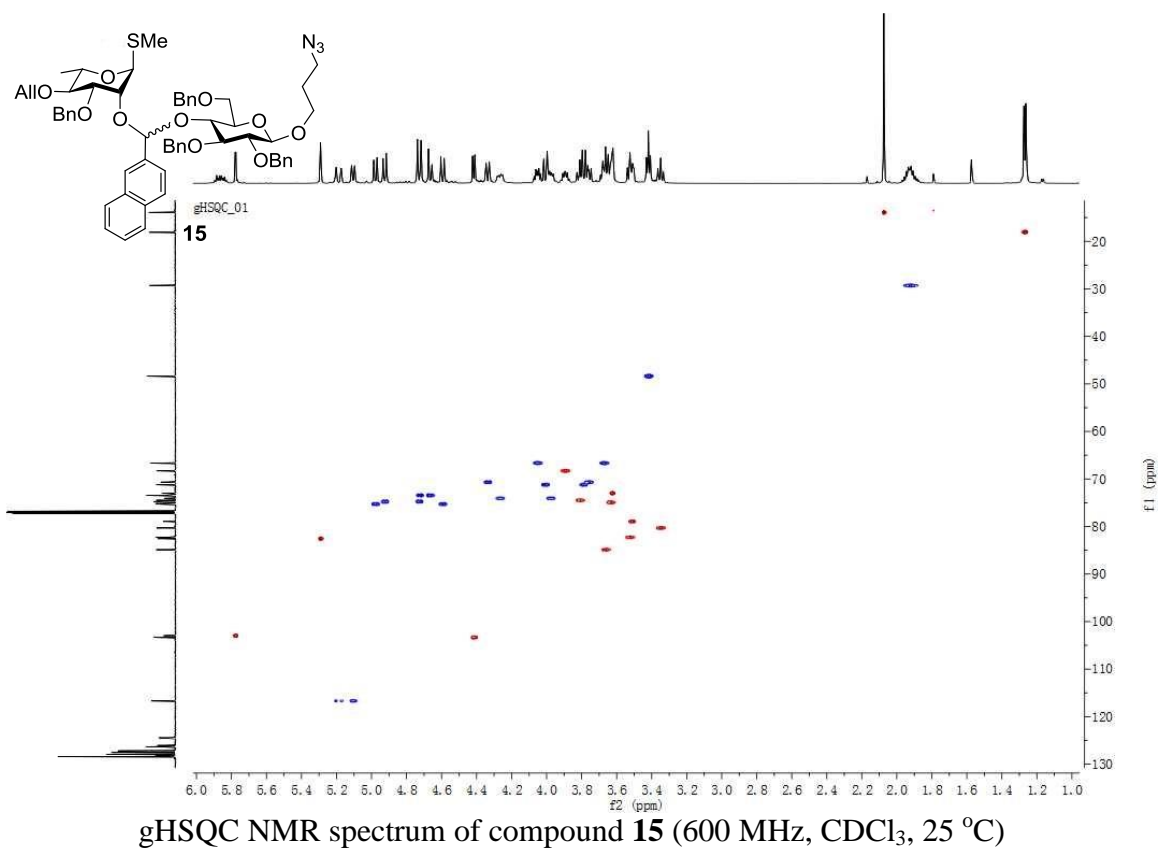

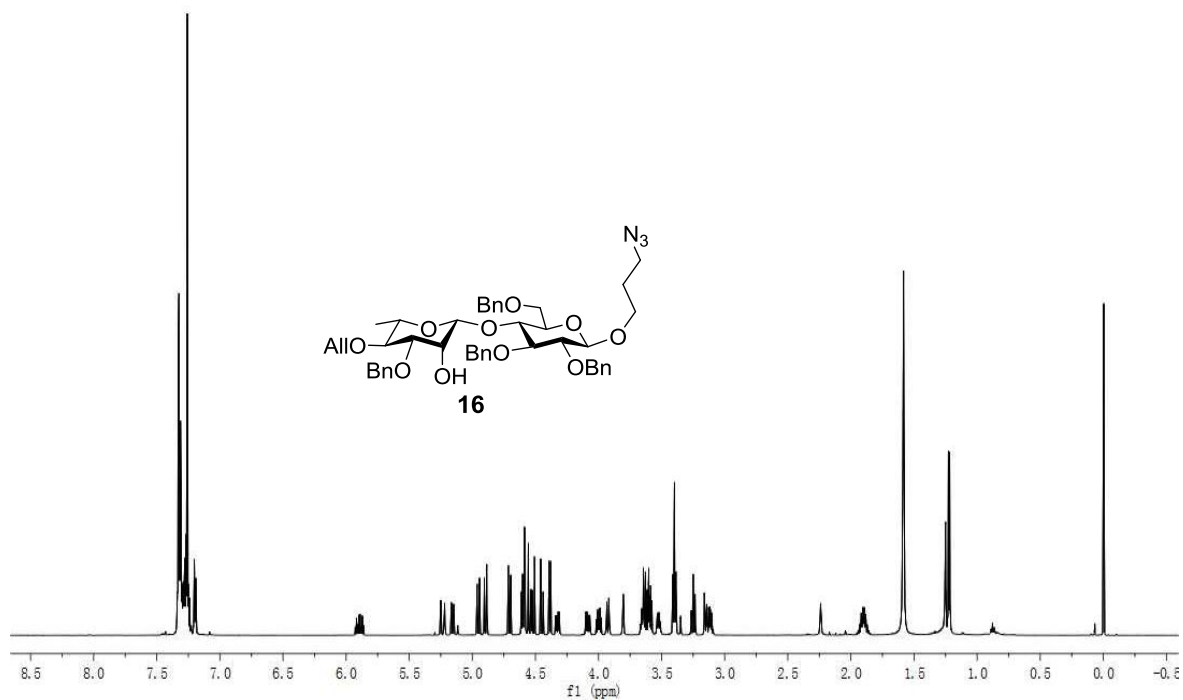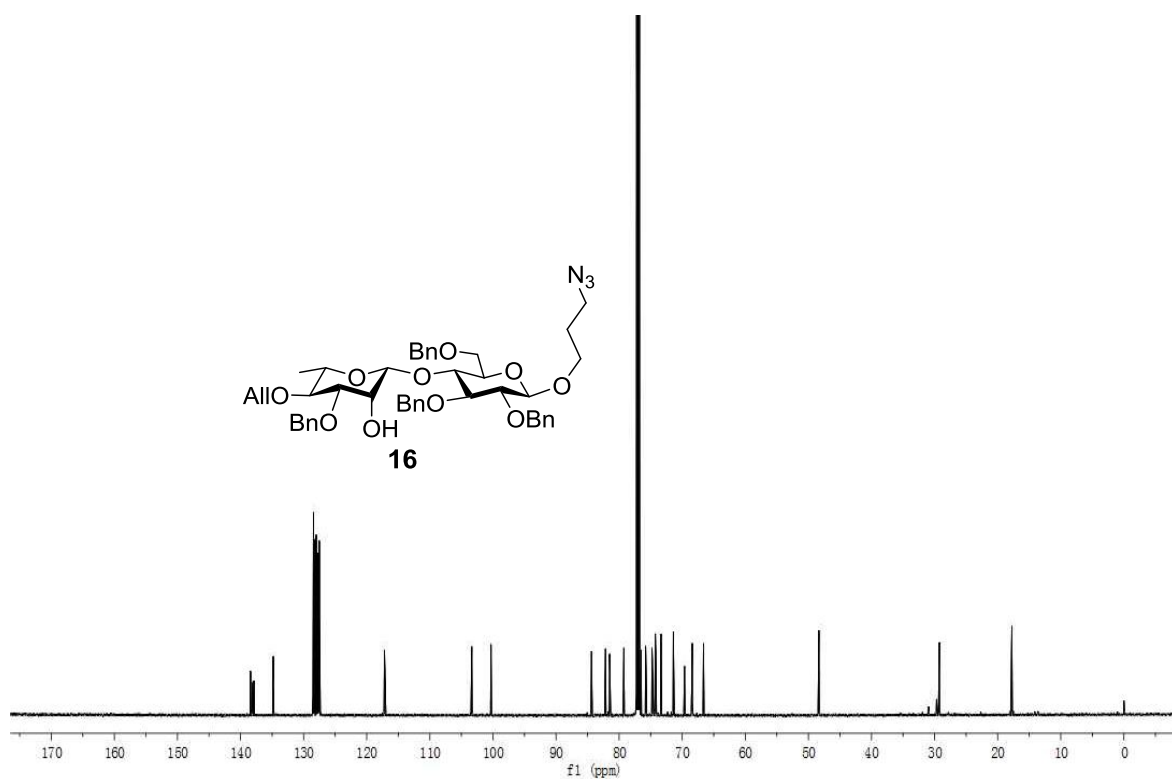

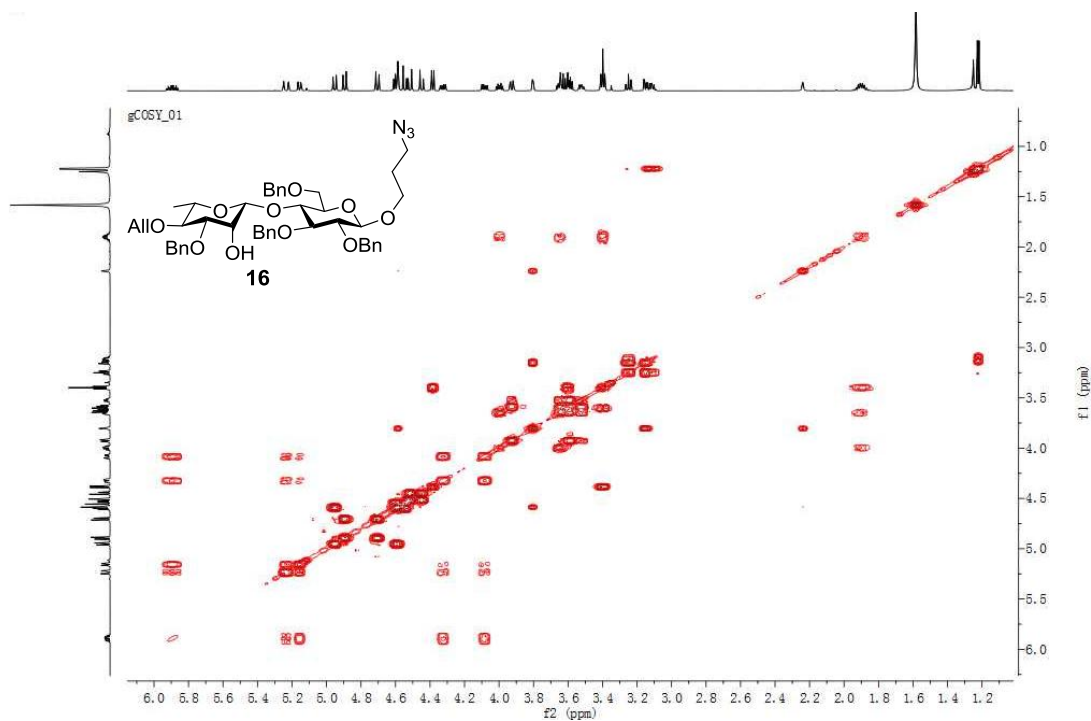

gCOSY NMR spectrum of compound **16** (600 MHz, CDCl<sub>3</sub>, 25 °C)

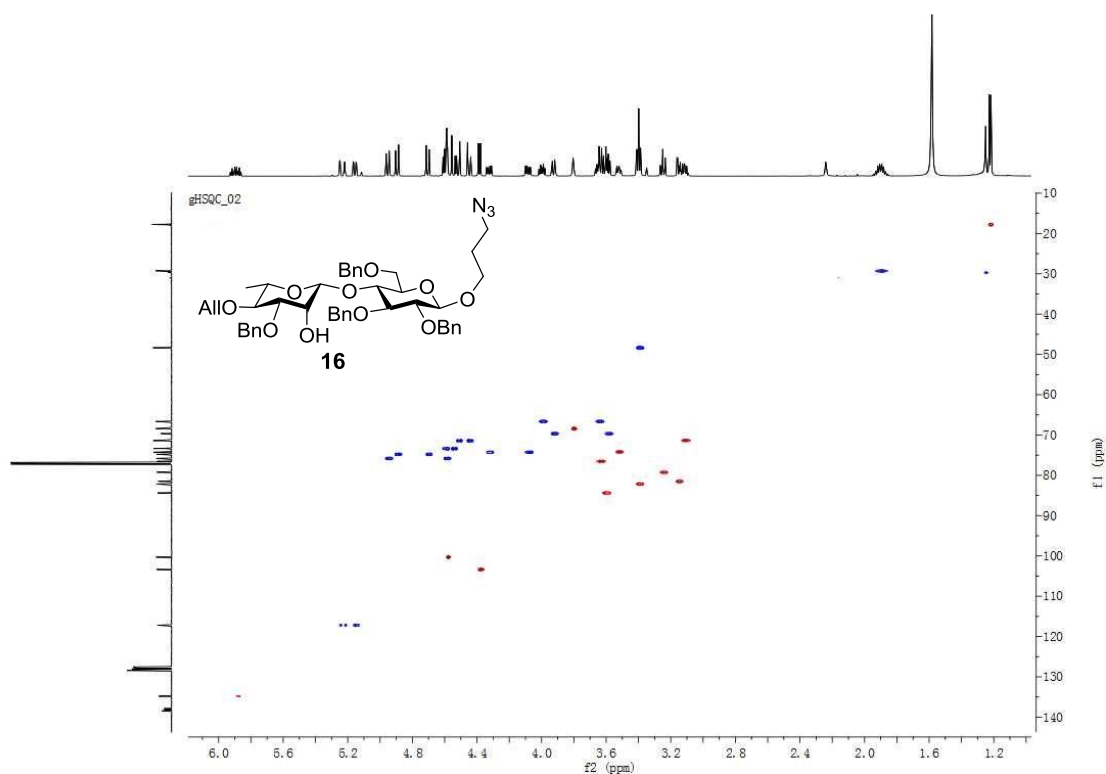

gHSQC NMR spectrum of compound **16** (600 MHz, CDCl<sub>3</sub>, 25 °C)

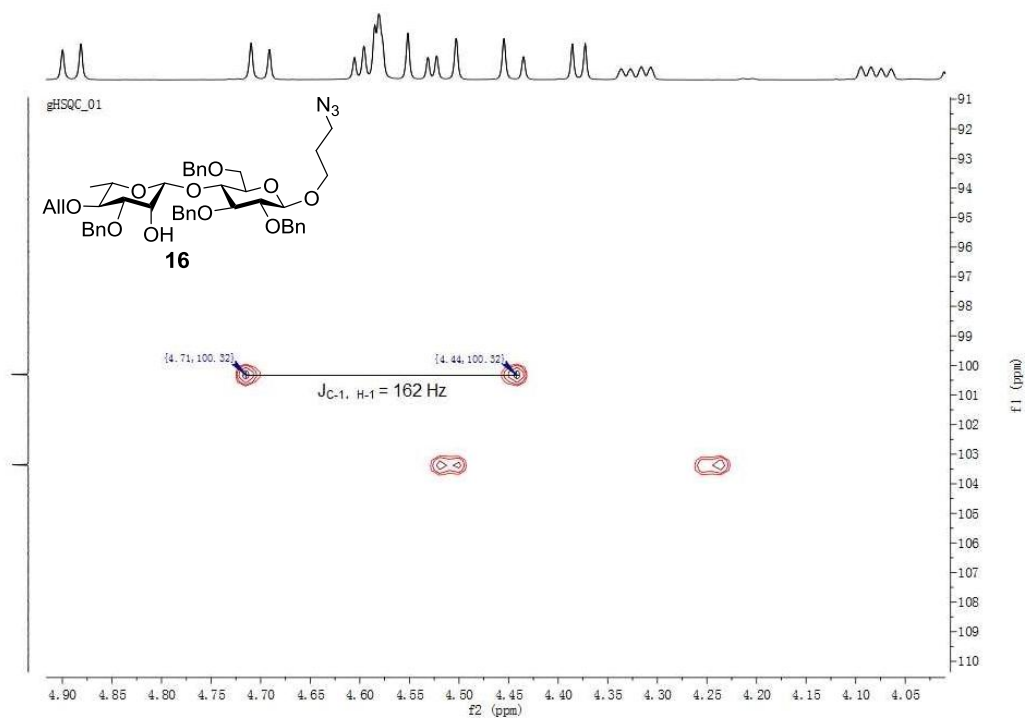

<sup>1</sup>H-Coupled gHSQC NMR spectrum of compound **16** (600 MHz, CDCl<sub>3</sub>, 25 °C)

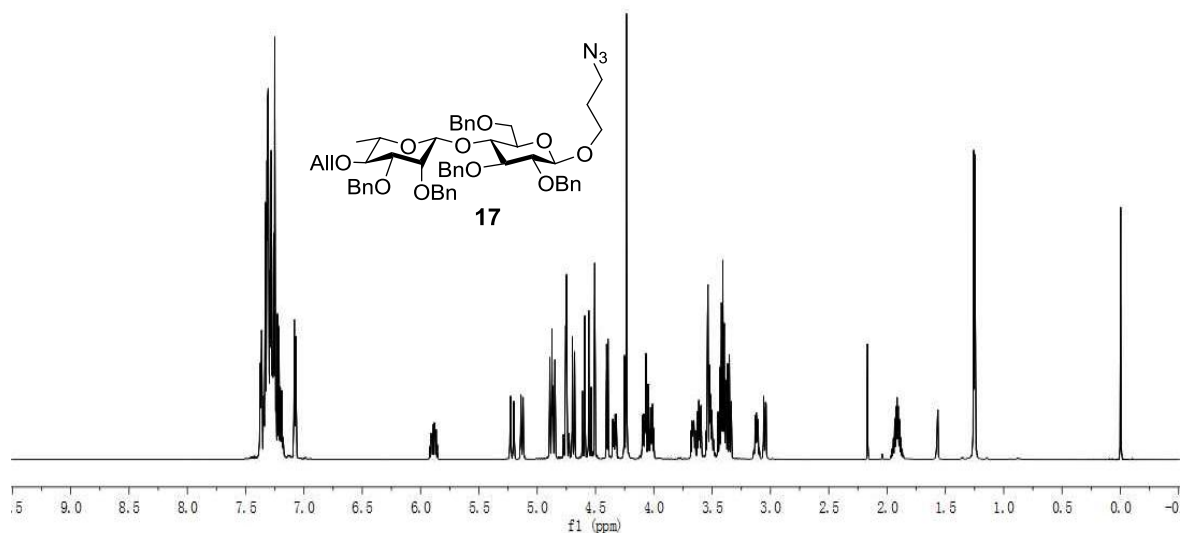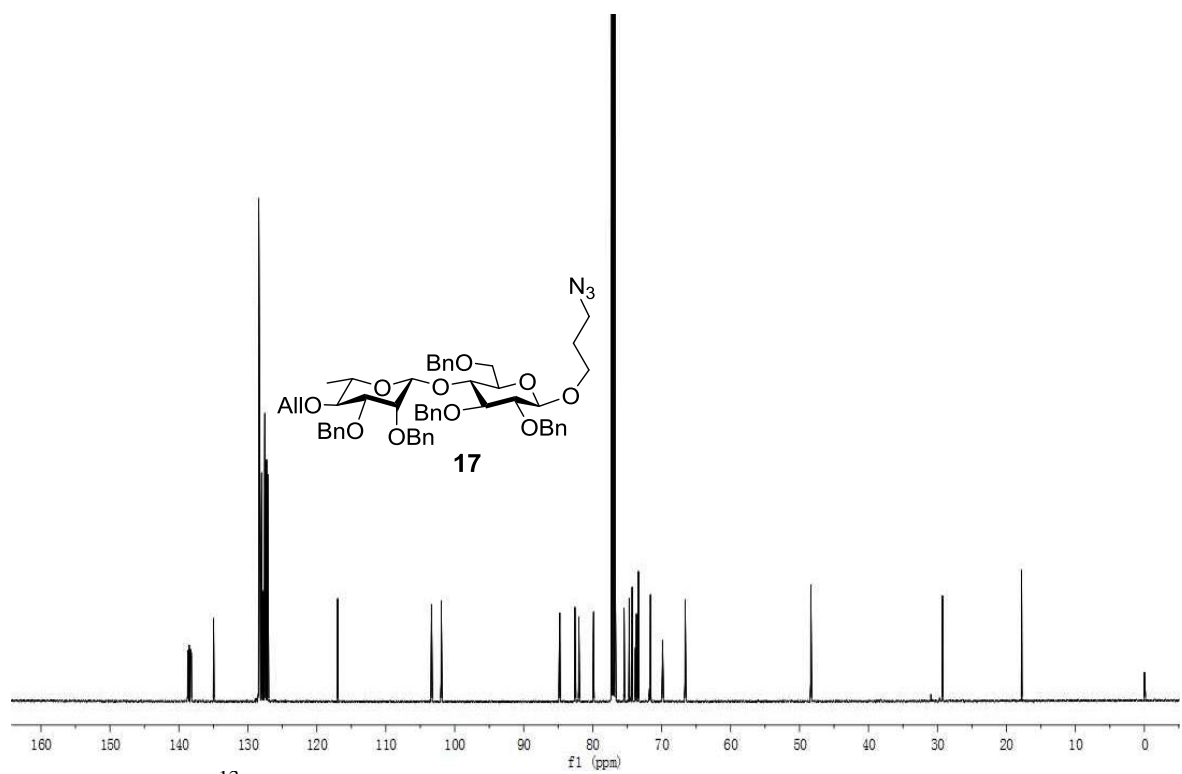

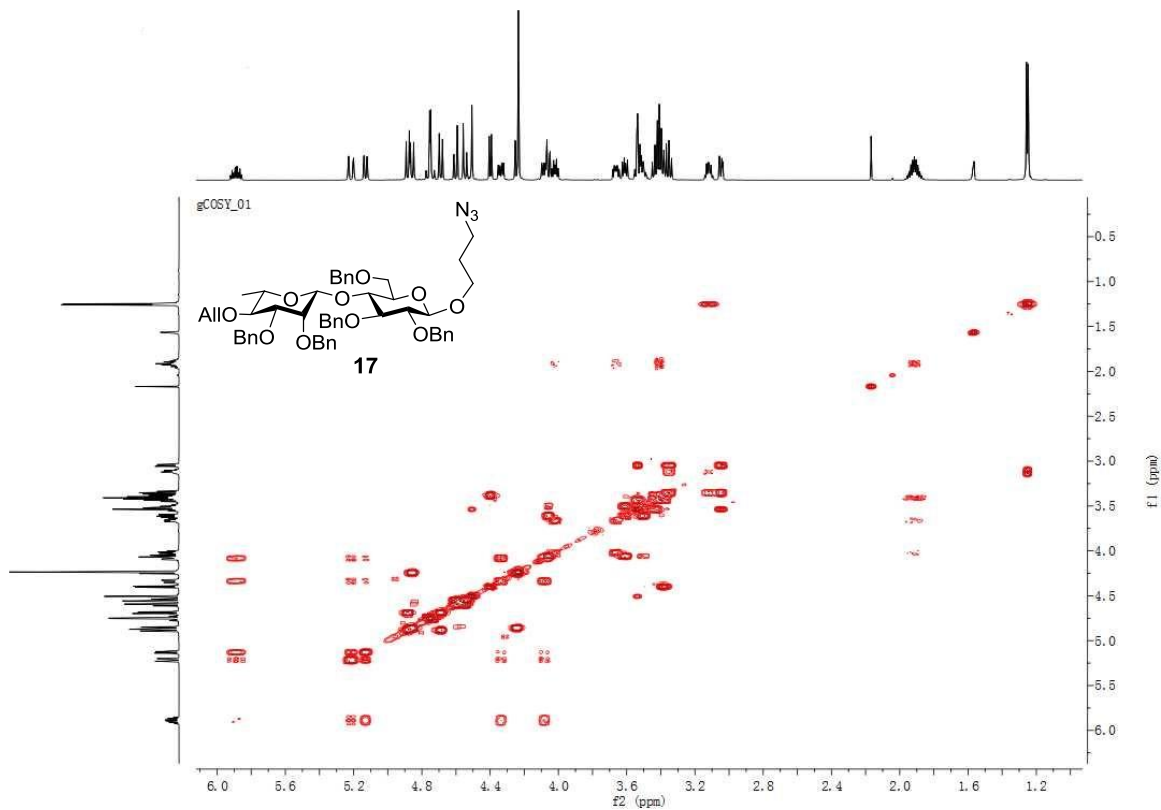

gCOSY NMR spectrum of compound **17** (600 MHz, CDCl<sub>3</sub>, 25 °C)

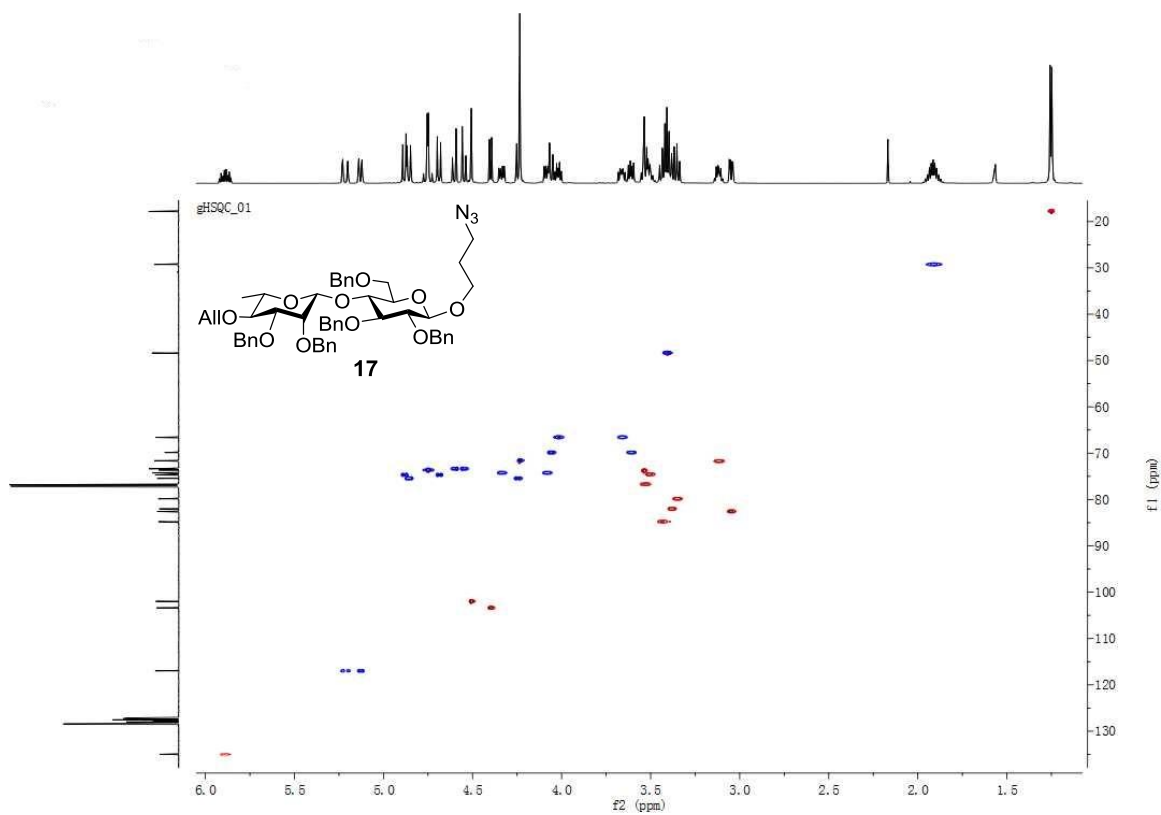

gHSQC NMR spectrum of compound **17** (600 MHz, CDCl<sub>3</sub>, 25 °C)

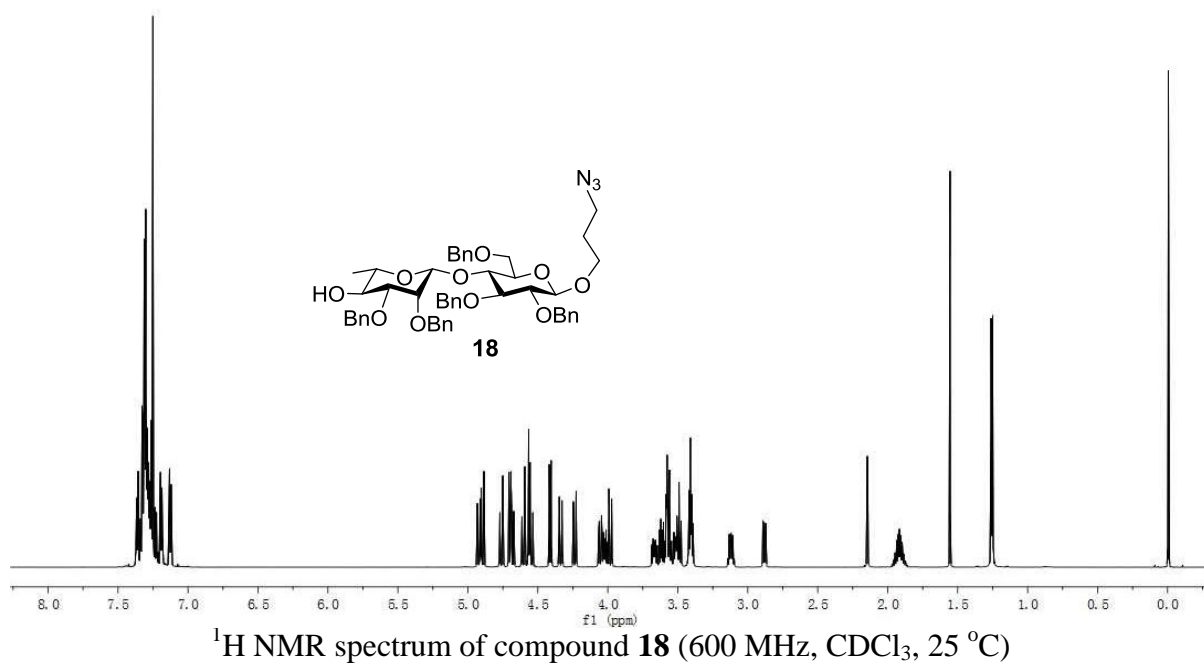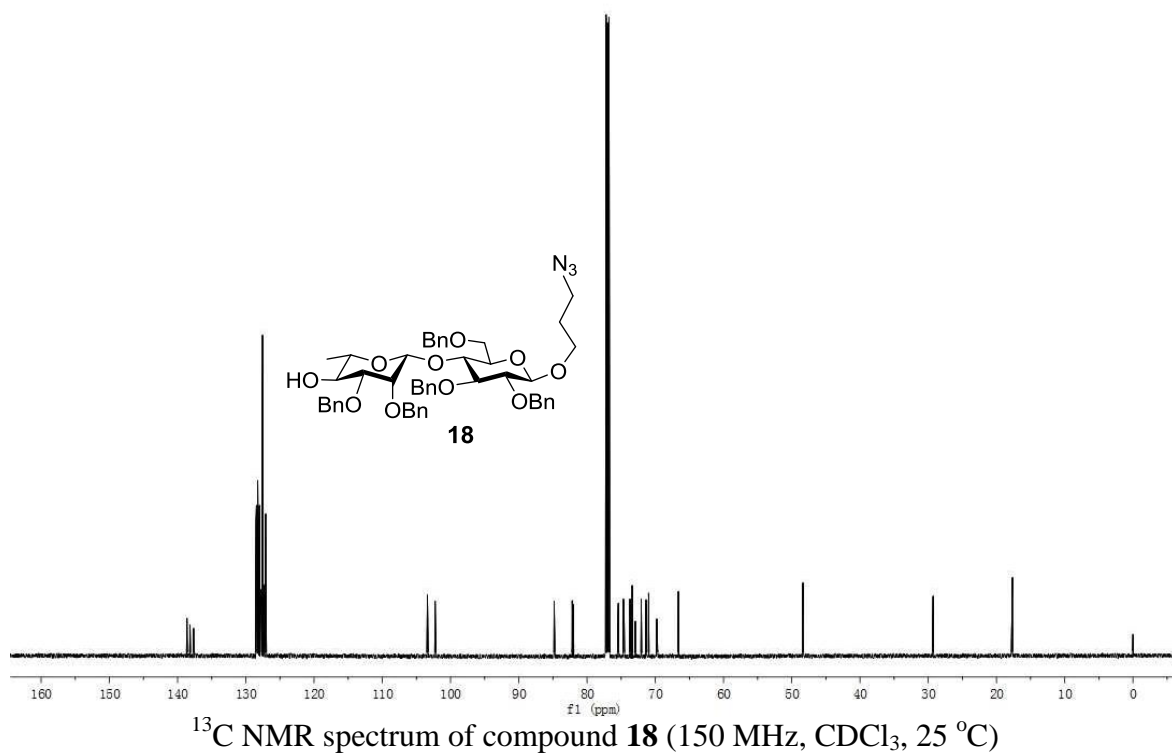



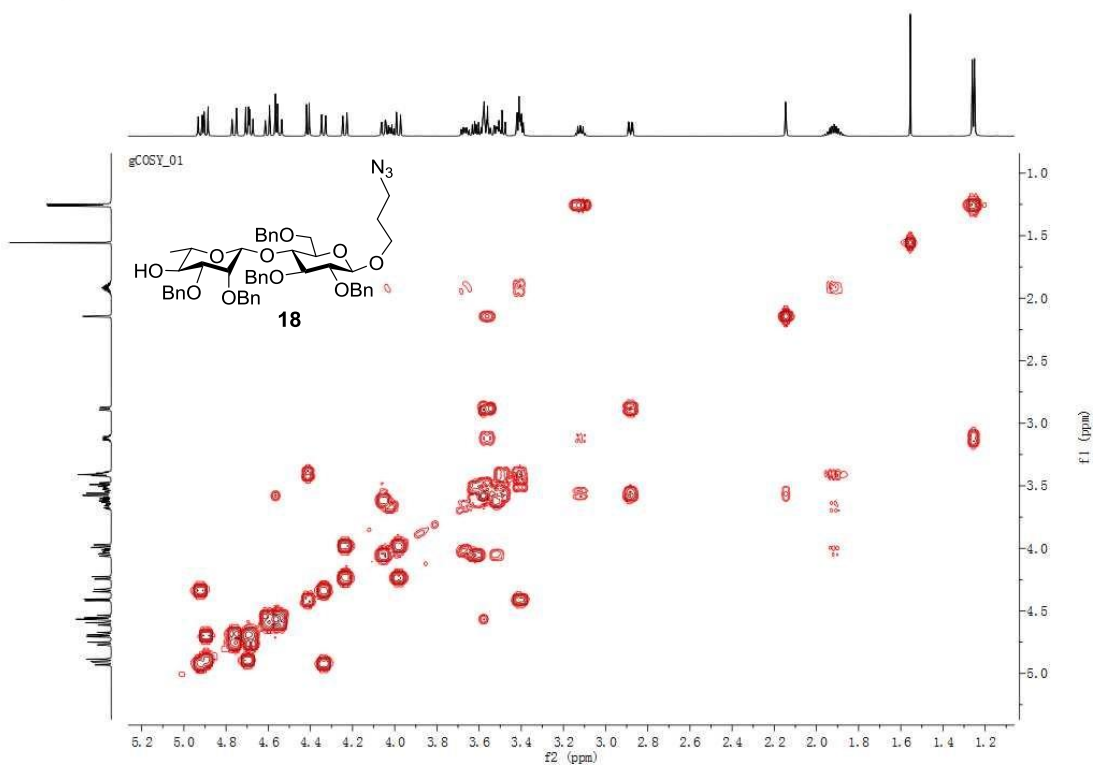

gCOSY NMR spectrum of compound **18** (600 MHz, CDCl<sub>3</sub>, 25 °C)

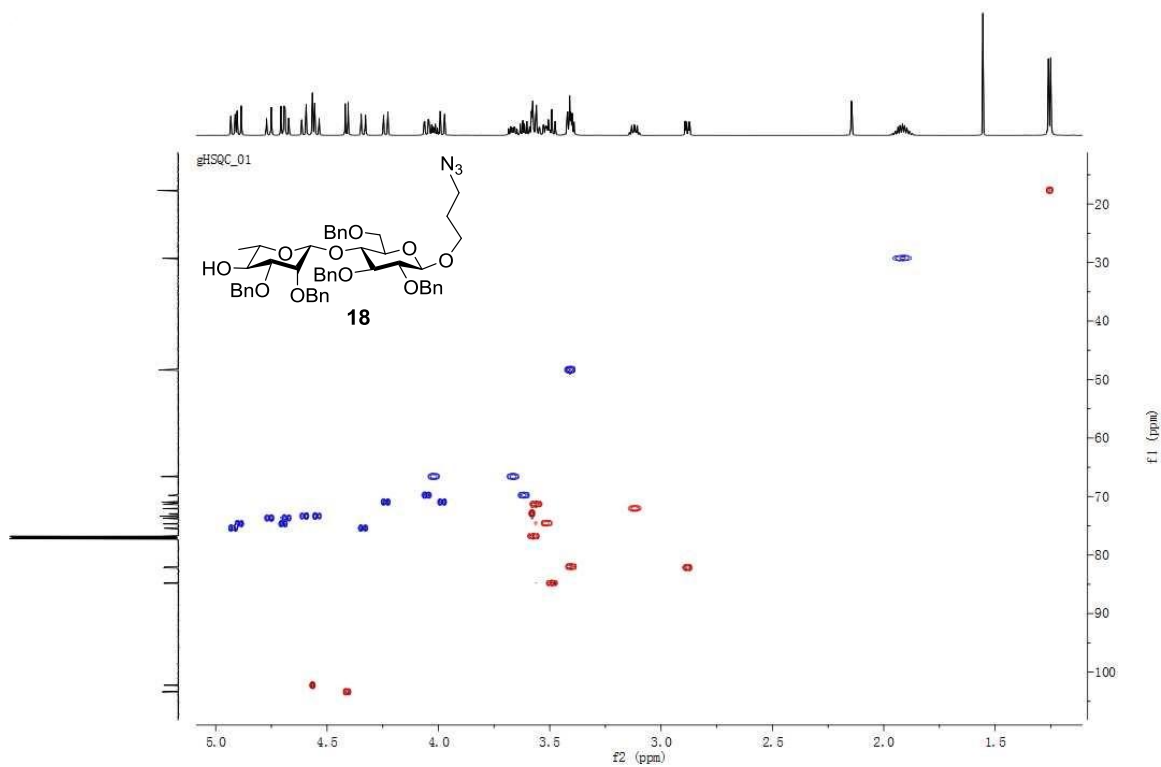

gHSQC NMR spectrum of compound **18** (600 MHz, CDCl<sub>3</sub>, 25 °C)

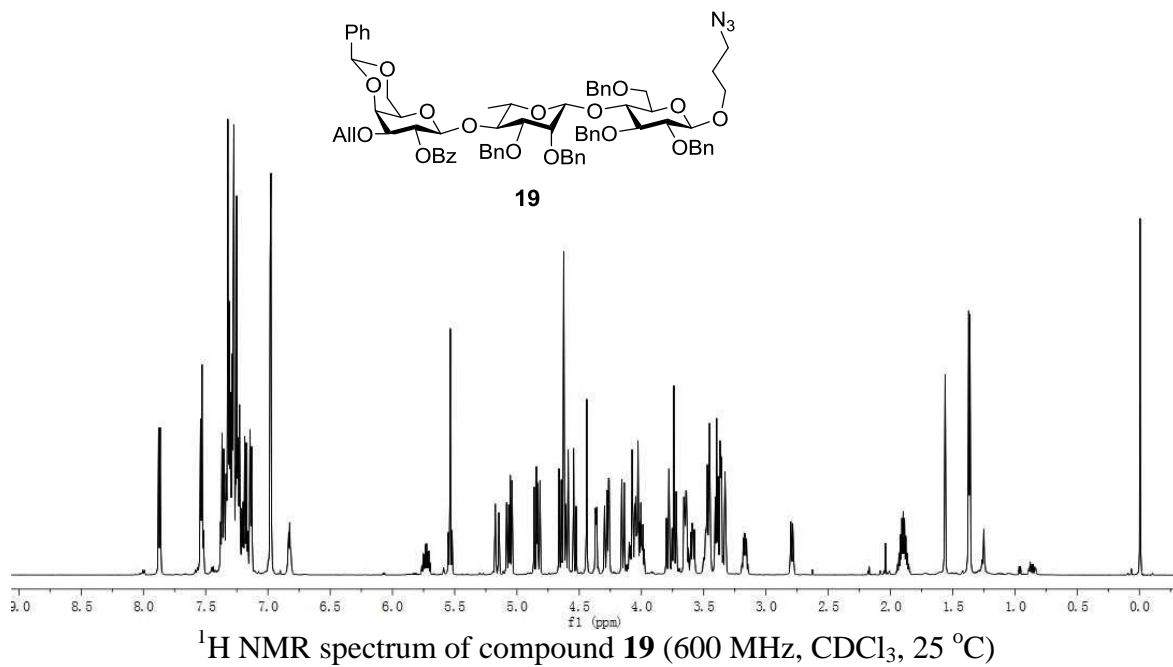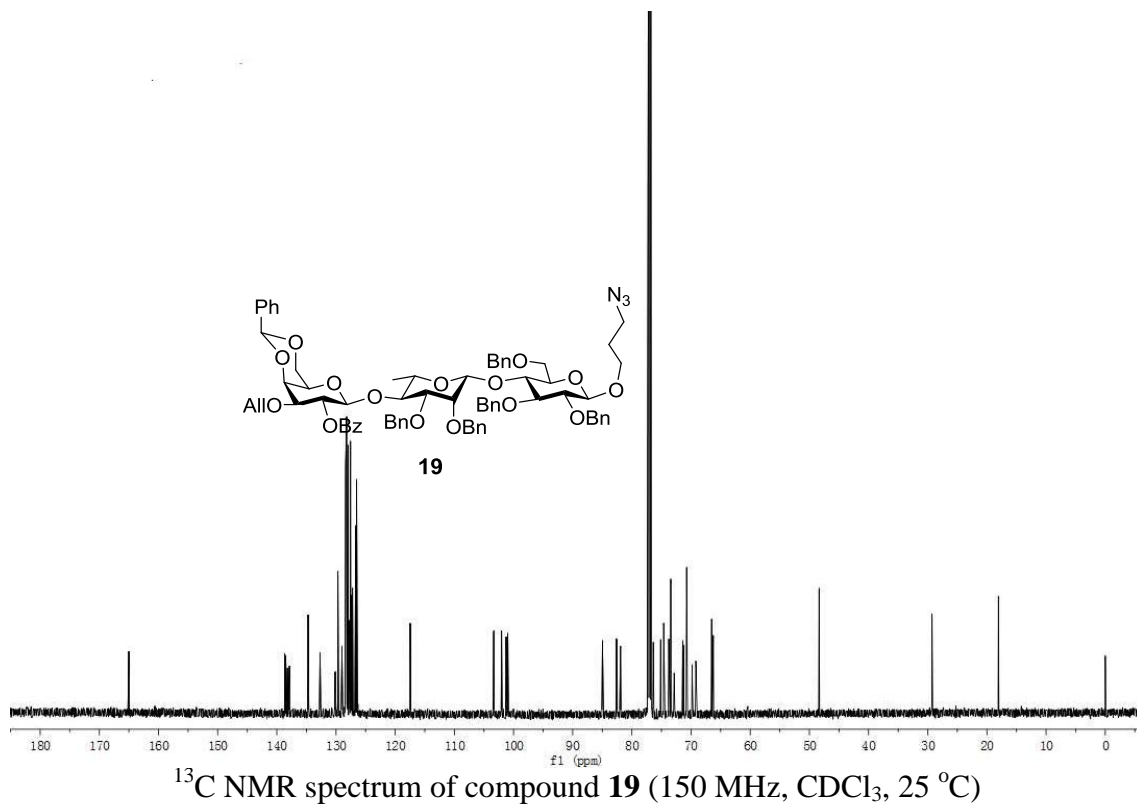

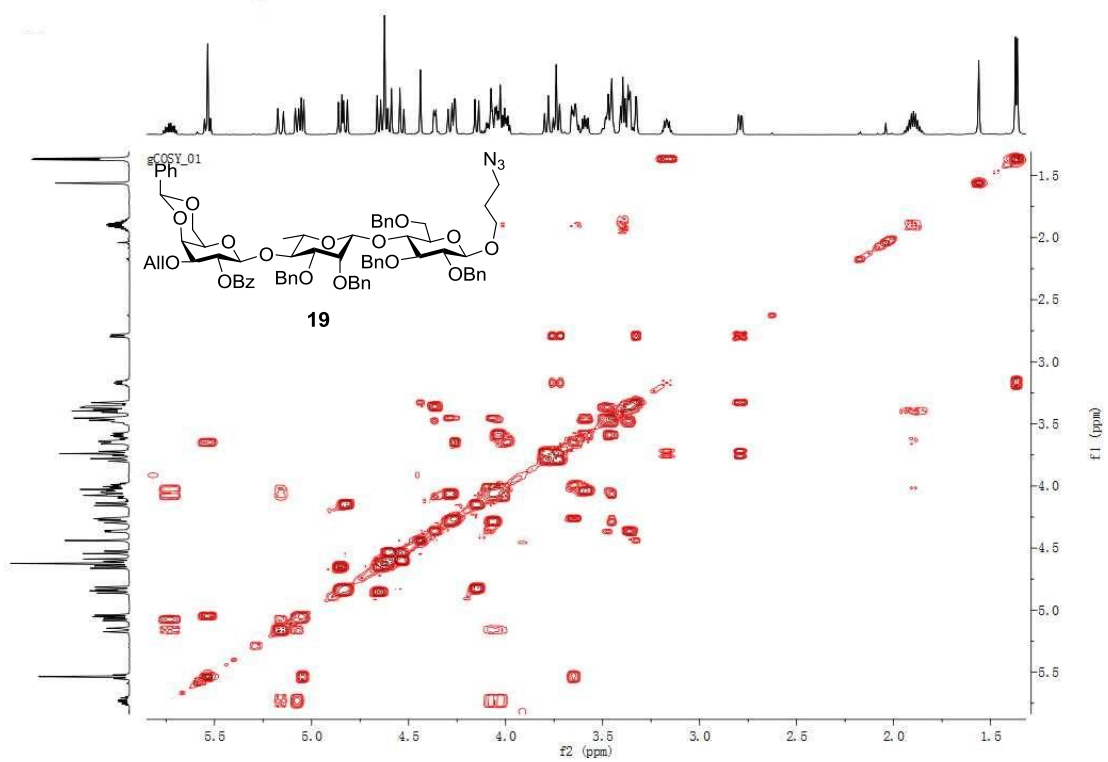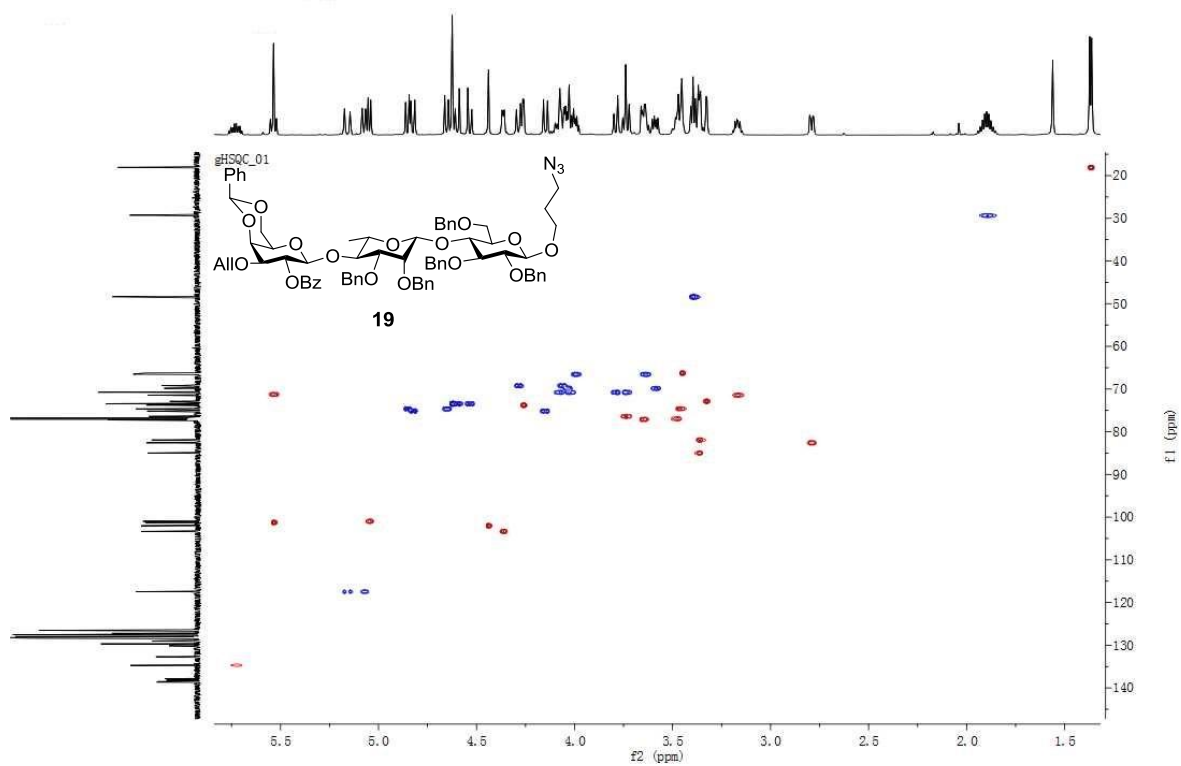

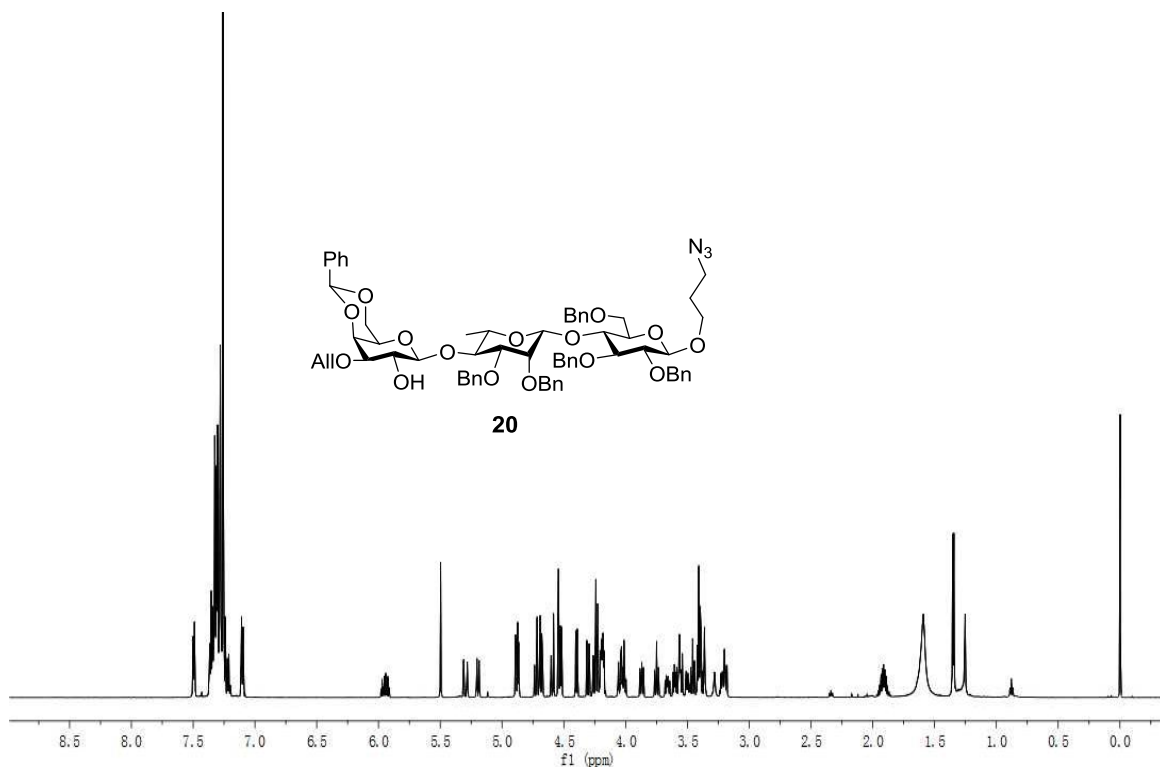

<sup>1</sup>H NMR spectrum of compound **20** (600 MHz, CDCl<sub>3</sub>, 25 °C)

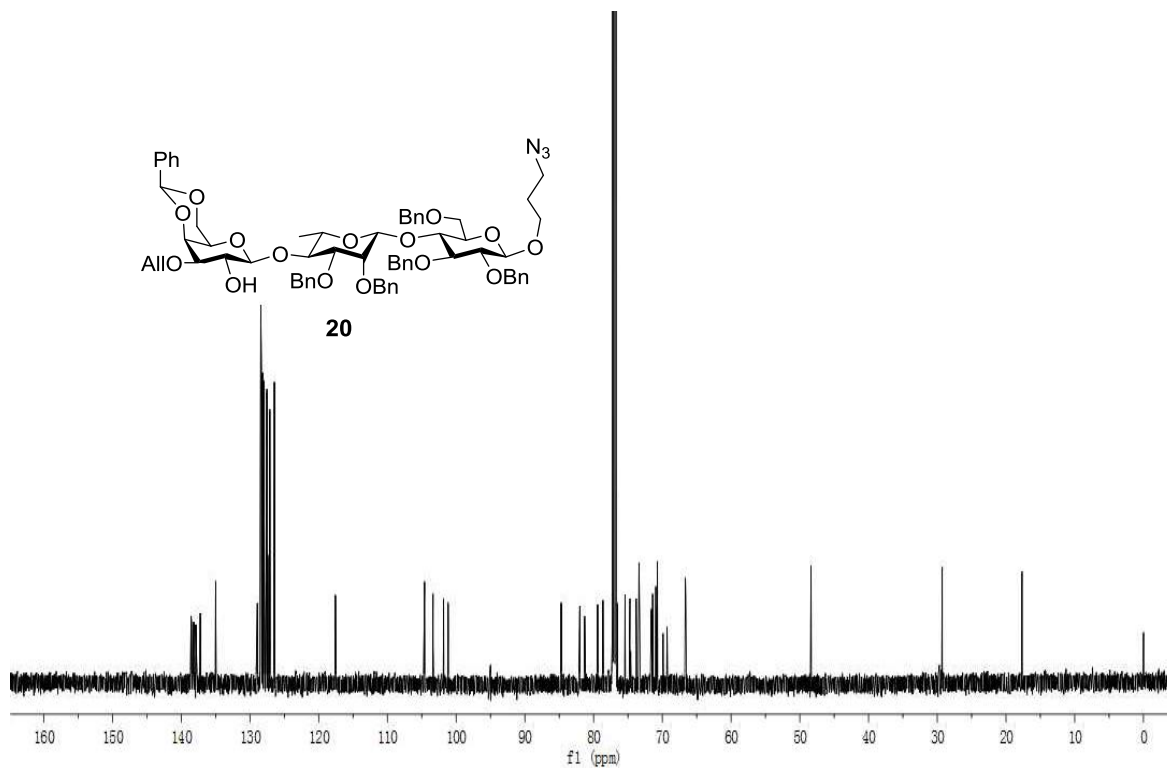

<sup>13</sup>C NMR spectrum of compound **20** (150 MHz, CDCl<sub>3</sub>, 25 °C)

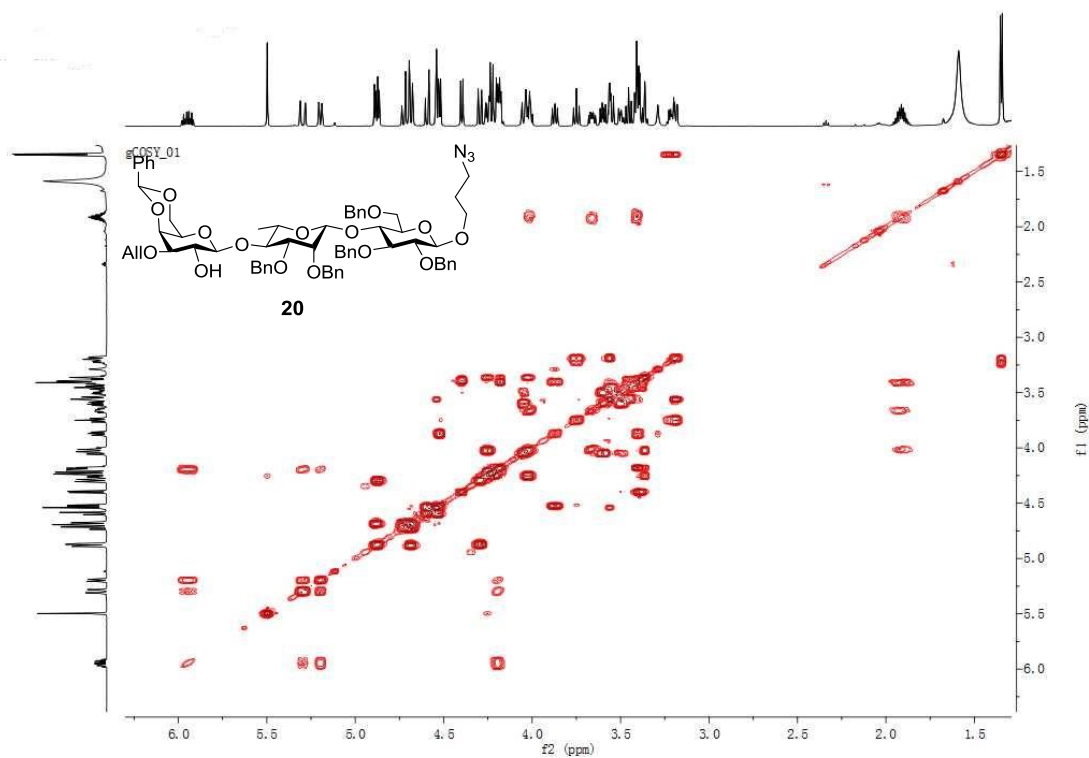

gCOSY NMR spectrum of compound **20** (600 MHz, CDCl<sub>3</sub>, 25 °C)

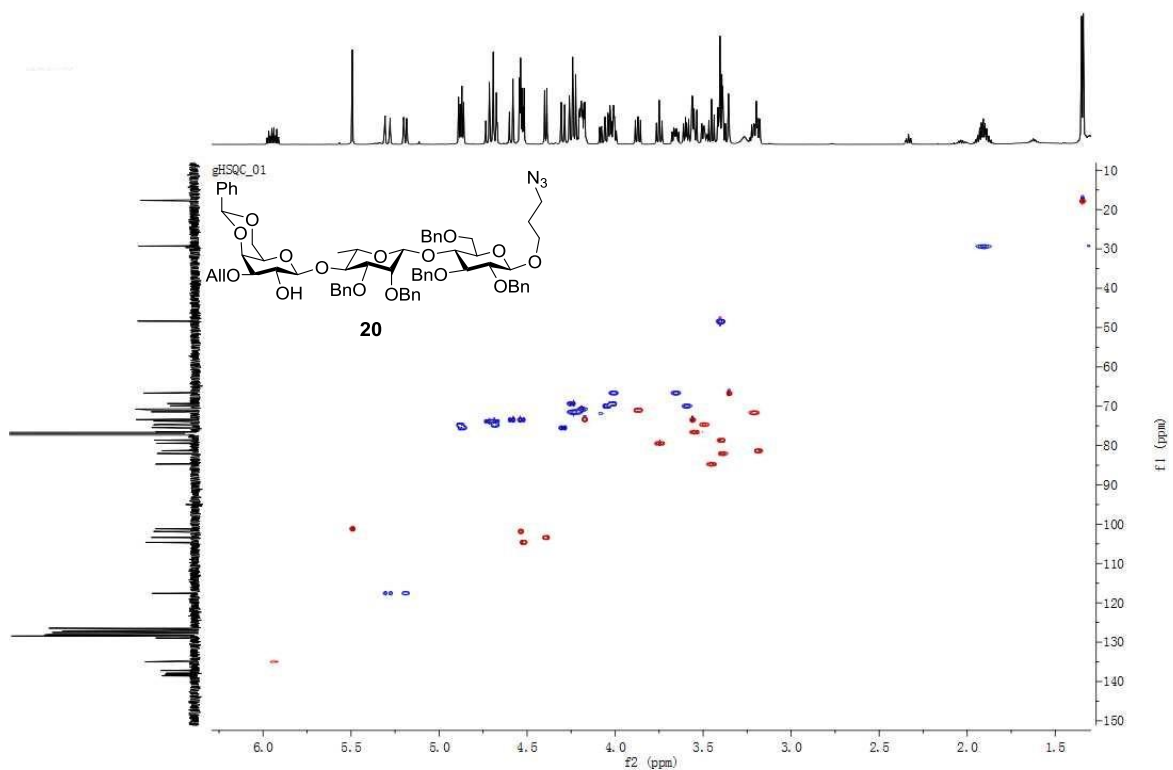

gHSQC NMR spectrum of compound **20** (600 MHz, CDCl<sub>3</sub>, 25 °C)

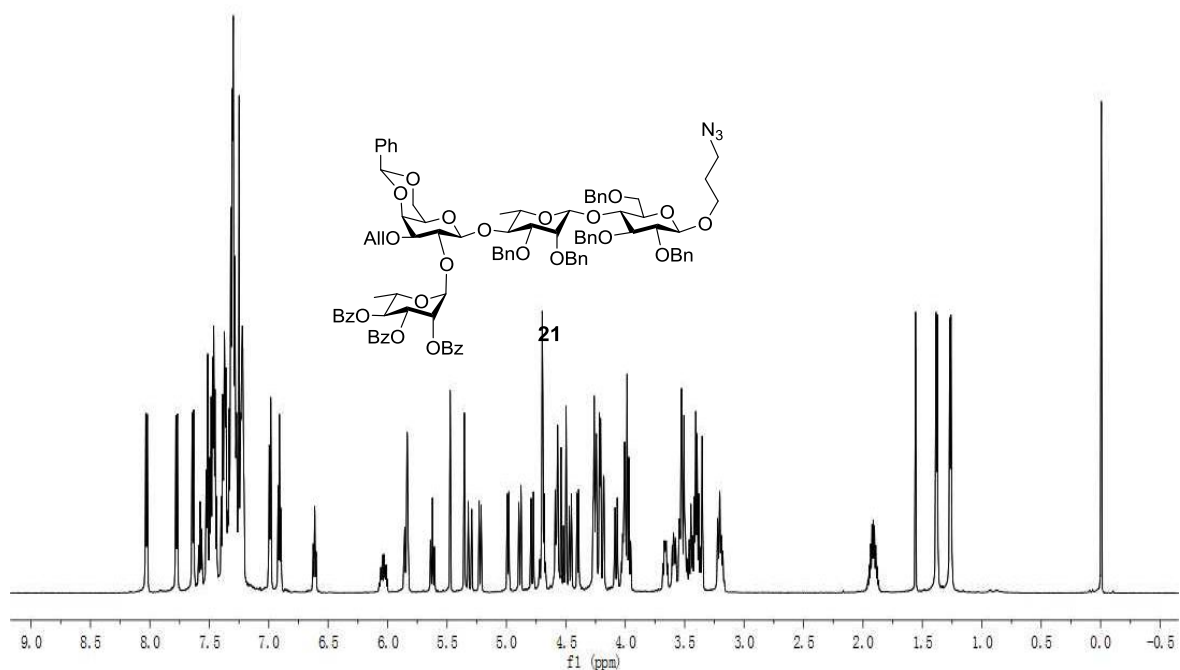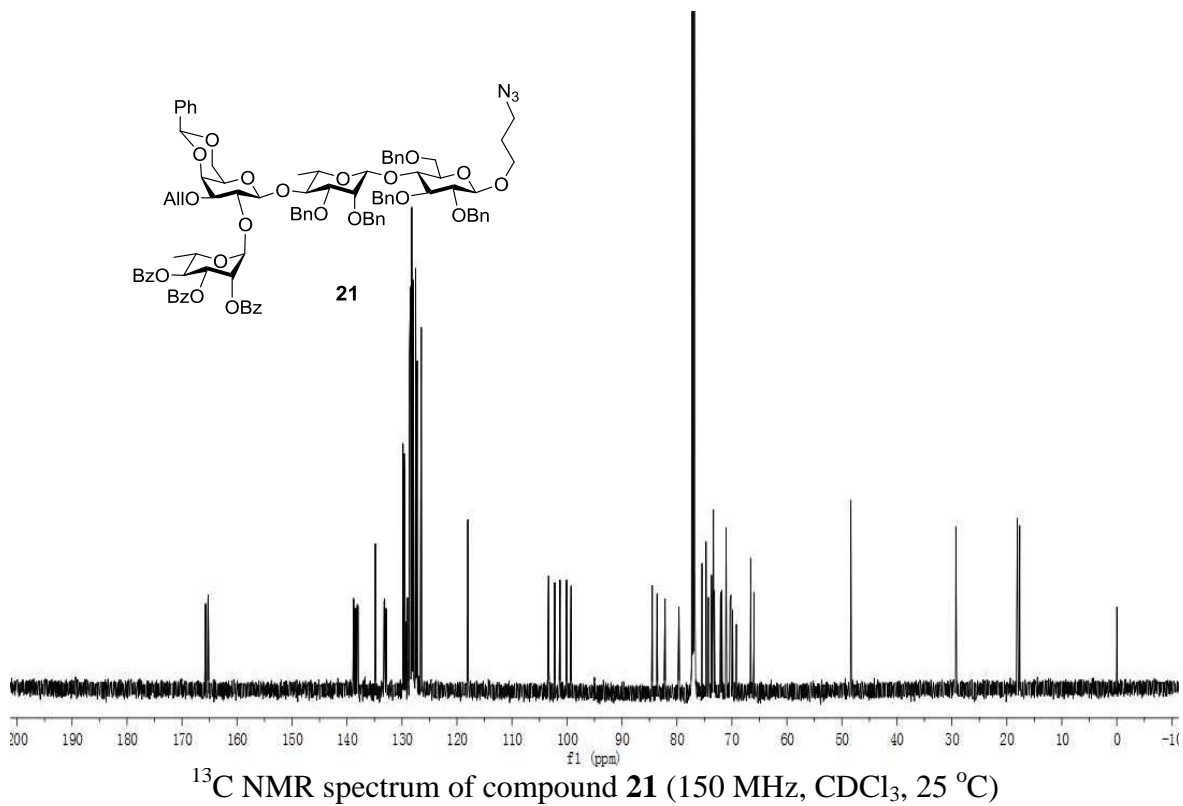

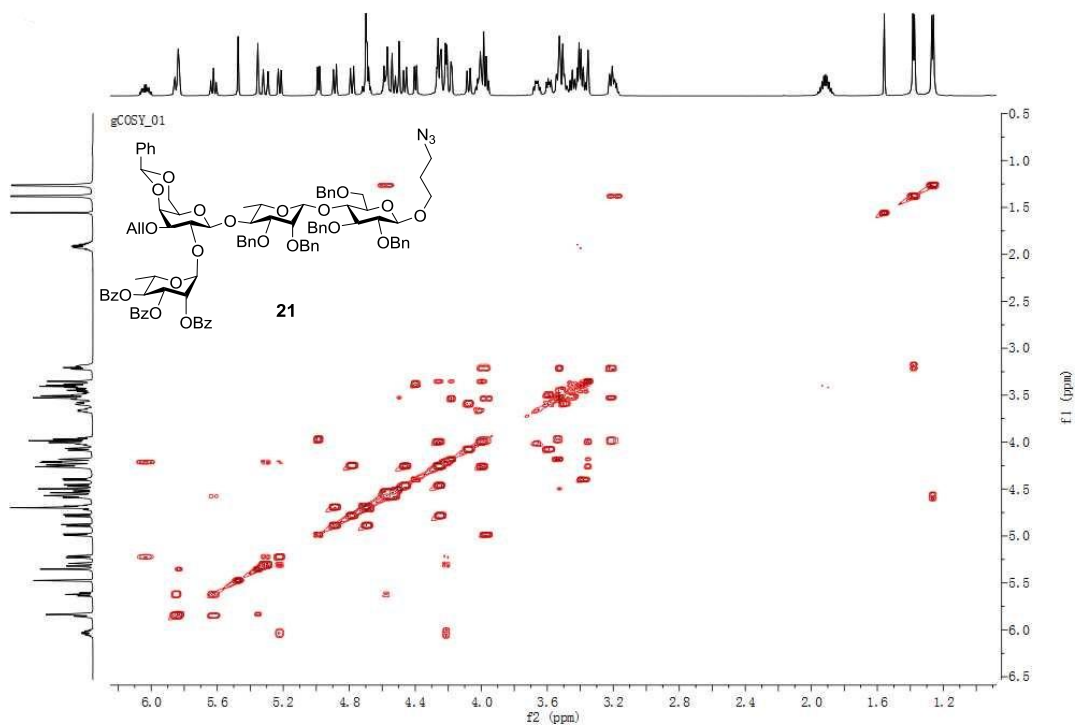

gCOSY NMR spectrum of compound **21** (600 MHz, CDCl<sub>3</sub>, 25 °C)

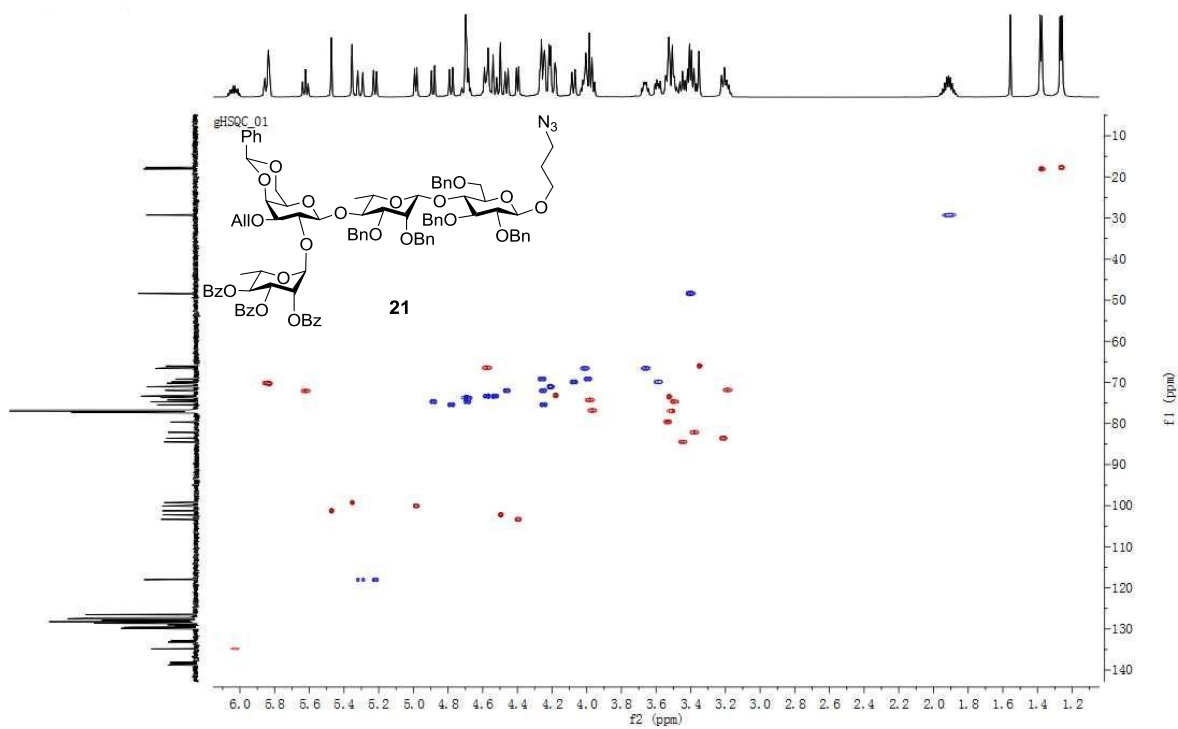

gHSQC NMR spectrum of compound **21** (600 MHz, CDCl<sub>3</sub>, 25 °C)

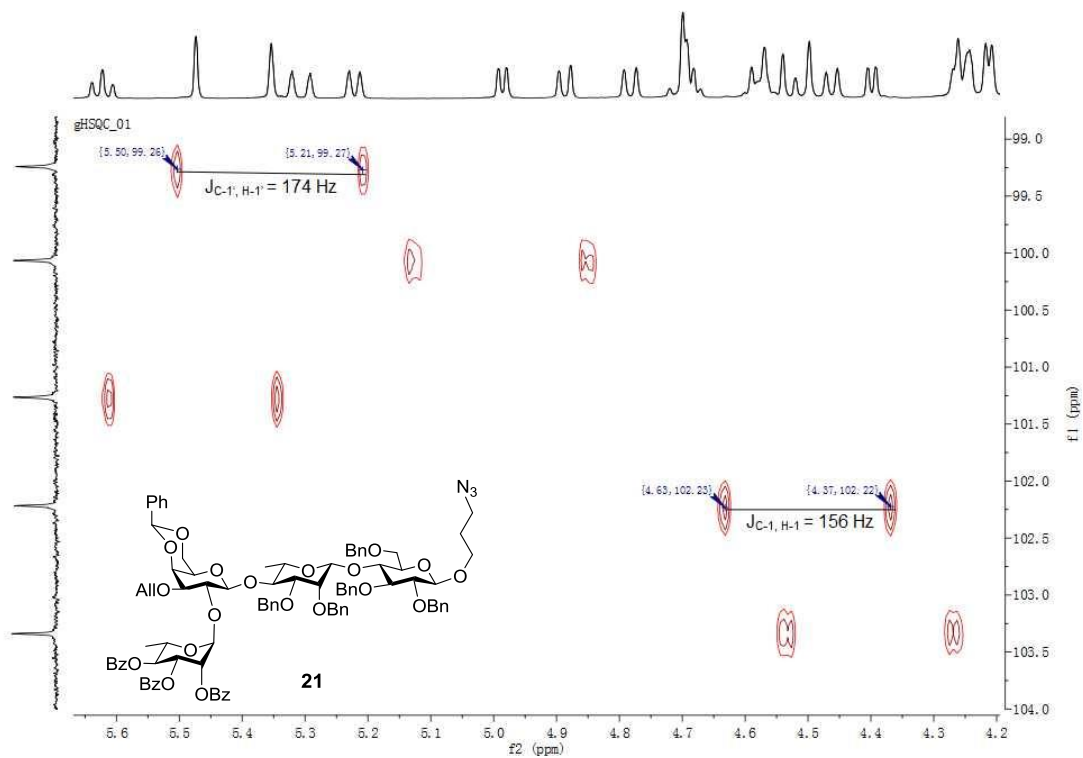

<sup>1</sup>H-Coupled gHSQC NMR spectrum of compound **21** (600 MHz, CDCl<sub>3</sub>, 25 °C)



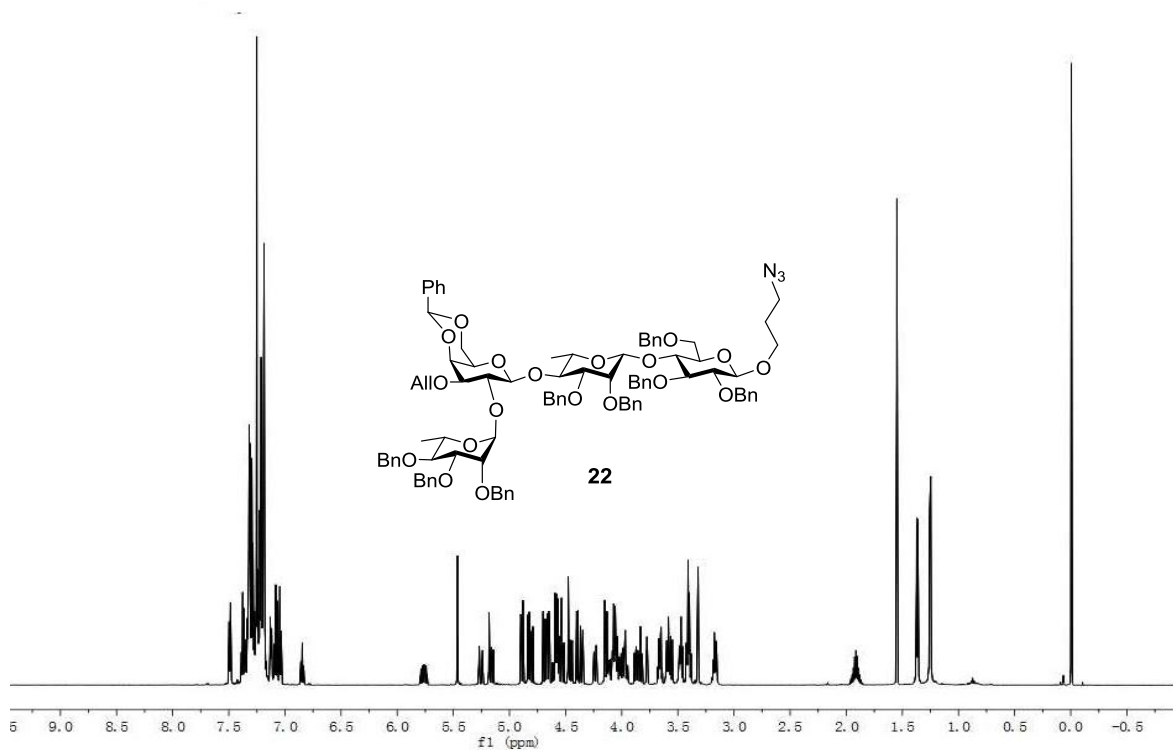

<sup>1</sup>H NMR spectrum of compound 22 (600 MHz, CDCl<sub>3</sub>, 25 °C)

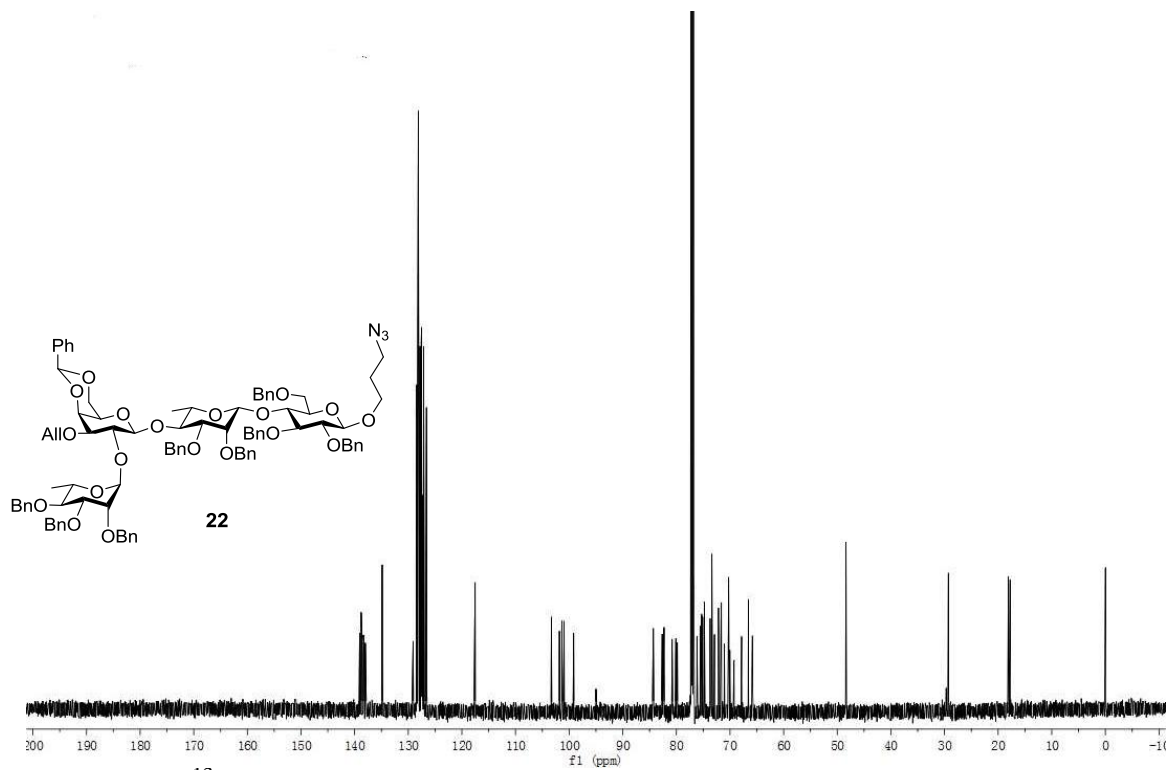

<sup>13</sup>C NMR spectrum of compound 22 (150 MHz, CDCl<sub>3</sub>, 25 °C)

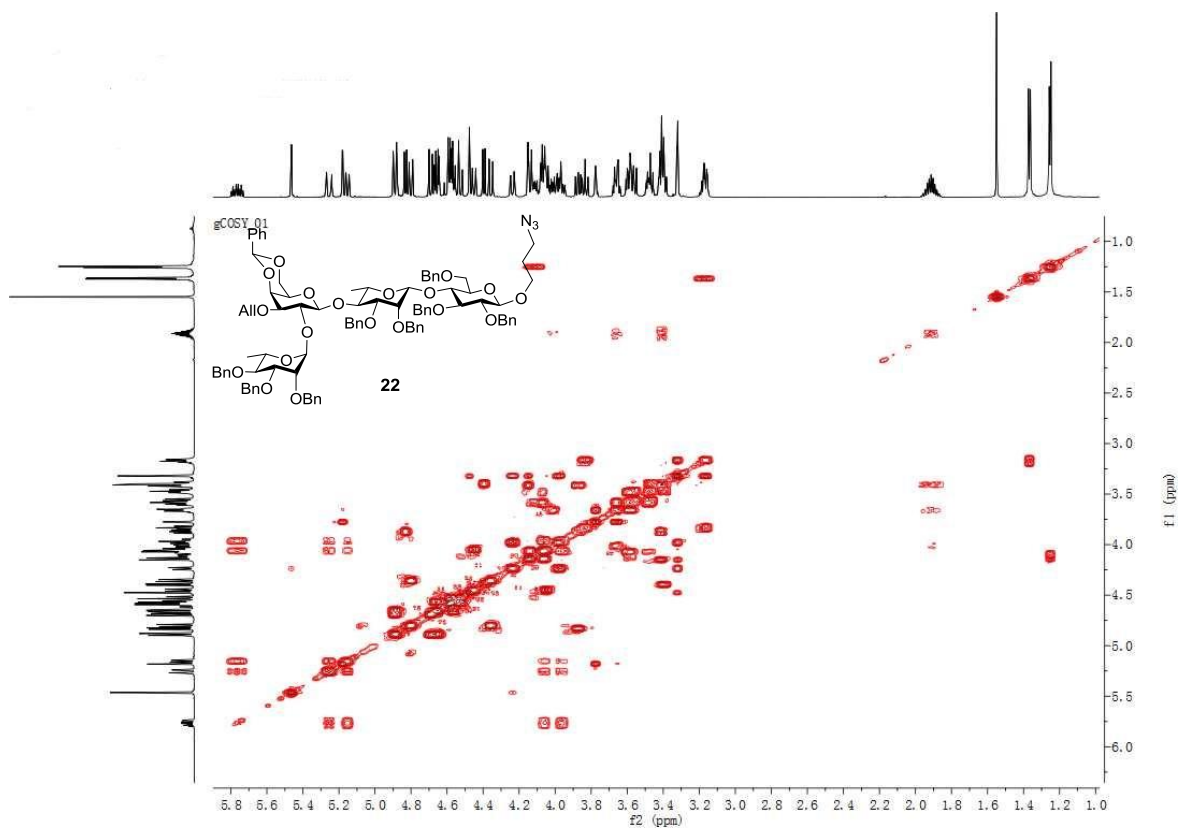

gCOSY NMR spectrum of compound **22** (600 MHz, CDCl<sub>3</sub>, 25 °C)

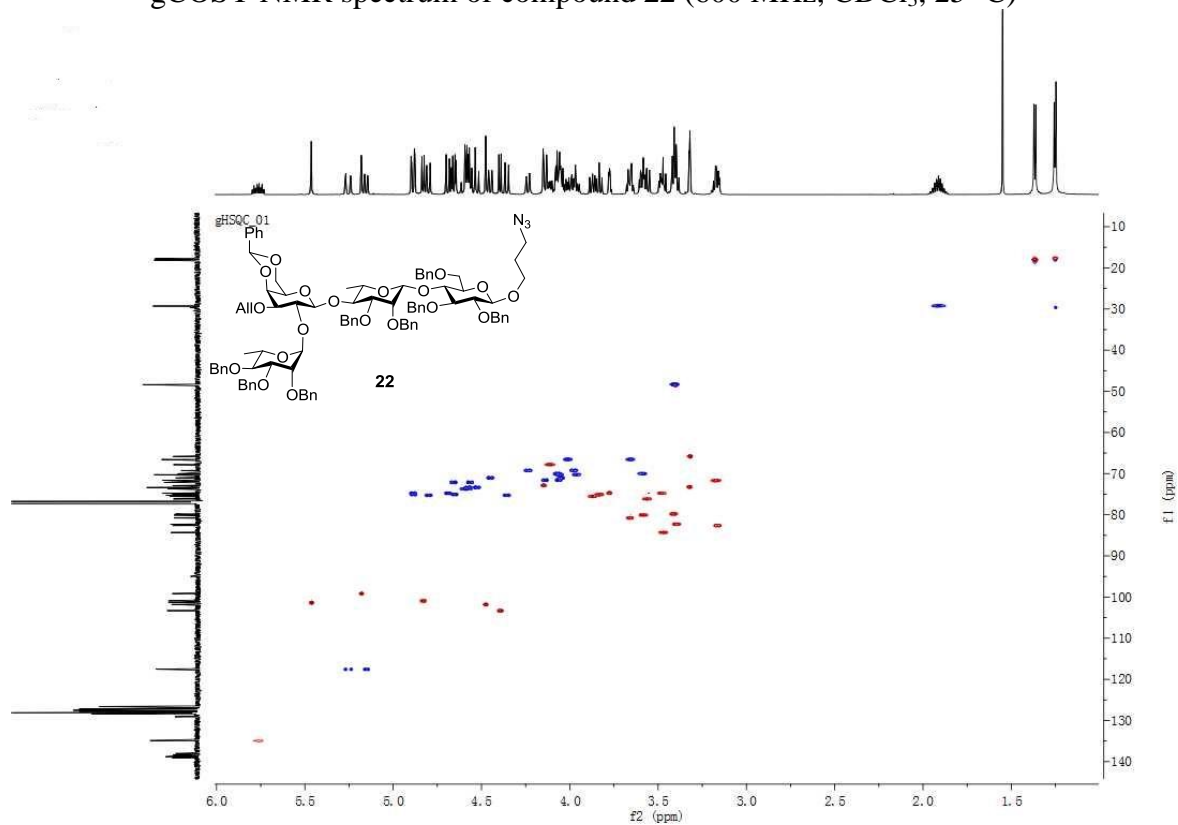

gHSQC NMR spectrum of compound **22** (600 MHz, CDCl<sub>3</sub>, 25 °C)

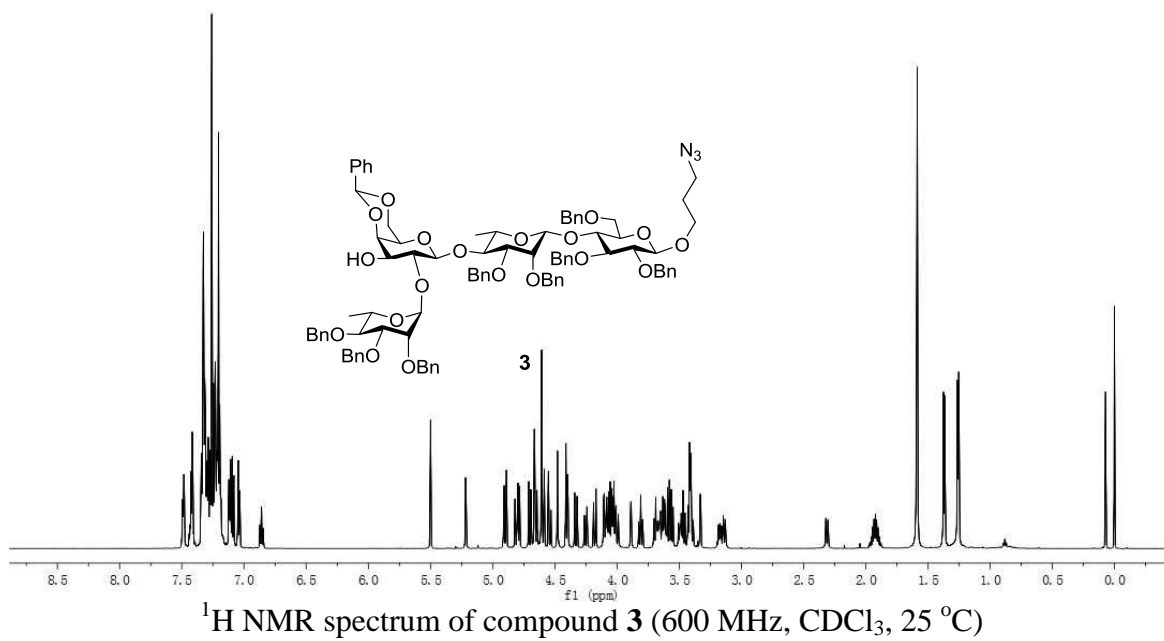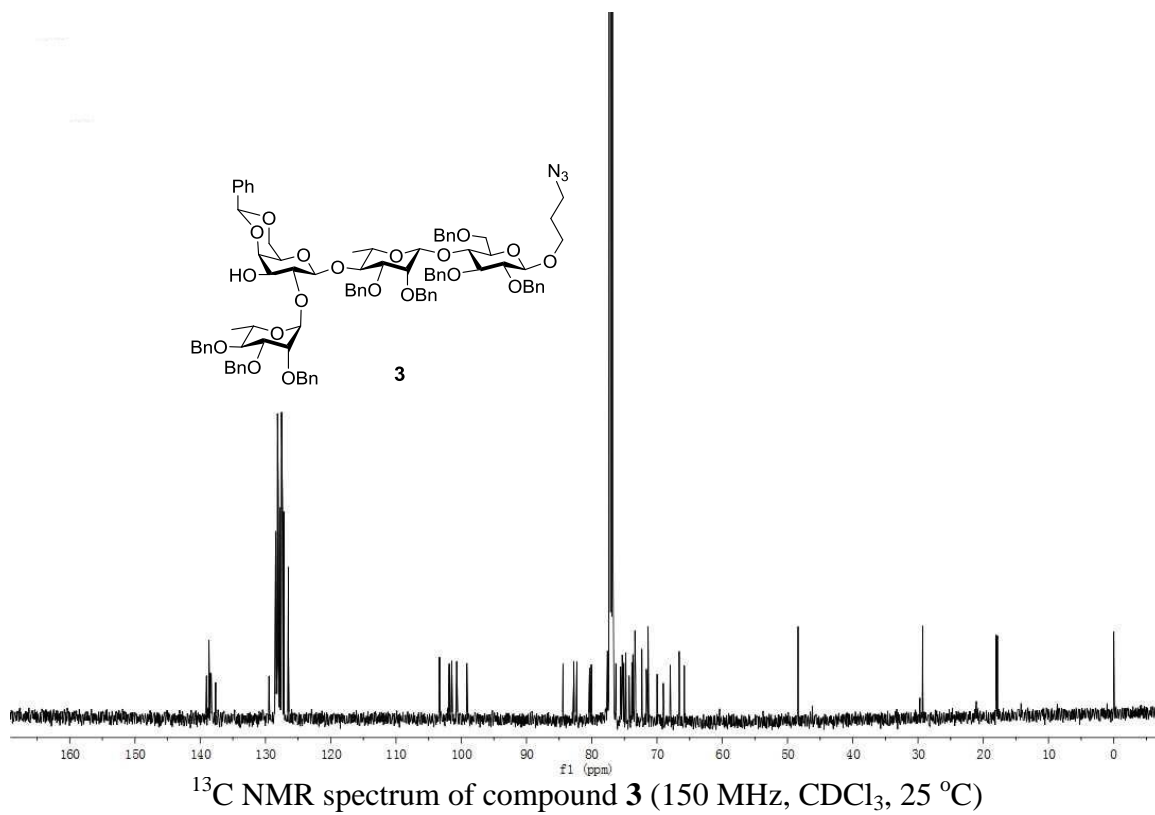

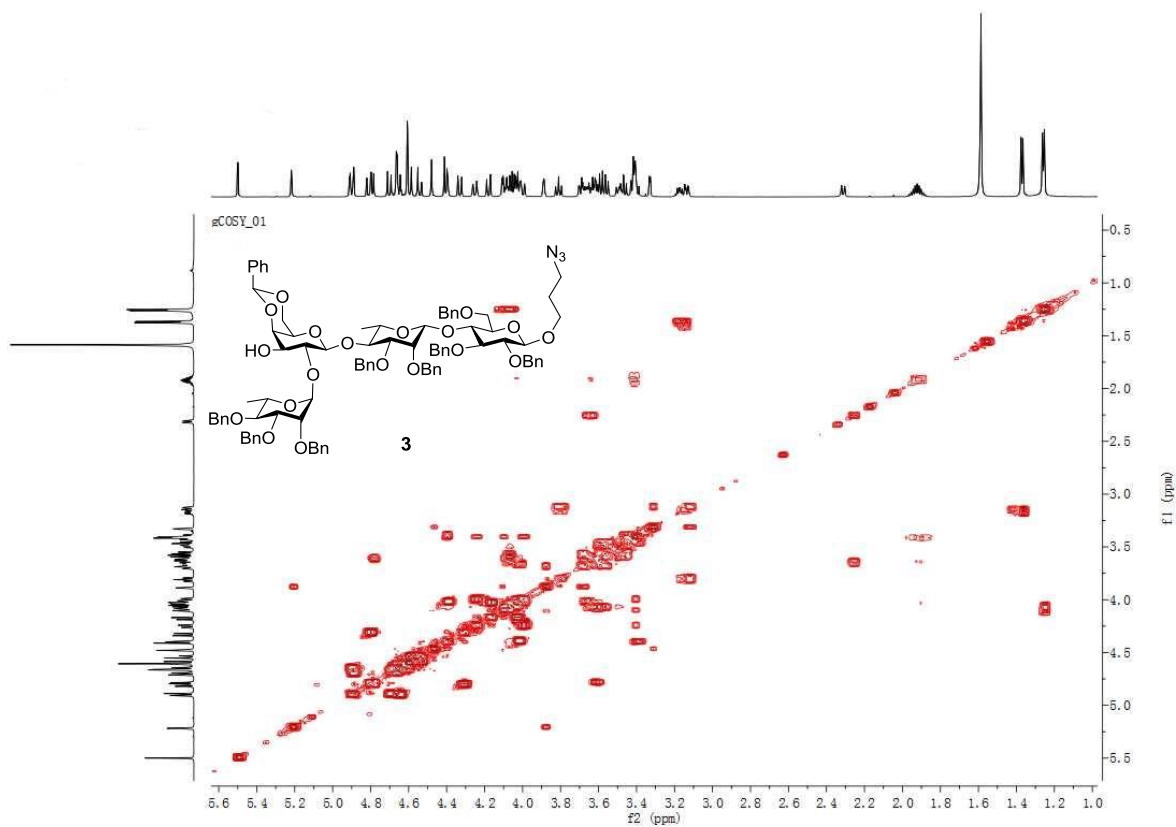

gCOSY NMR spectrum of compound **3** (600 MHz, CDCl<sub>3</sub>, 25 °C)

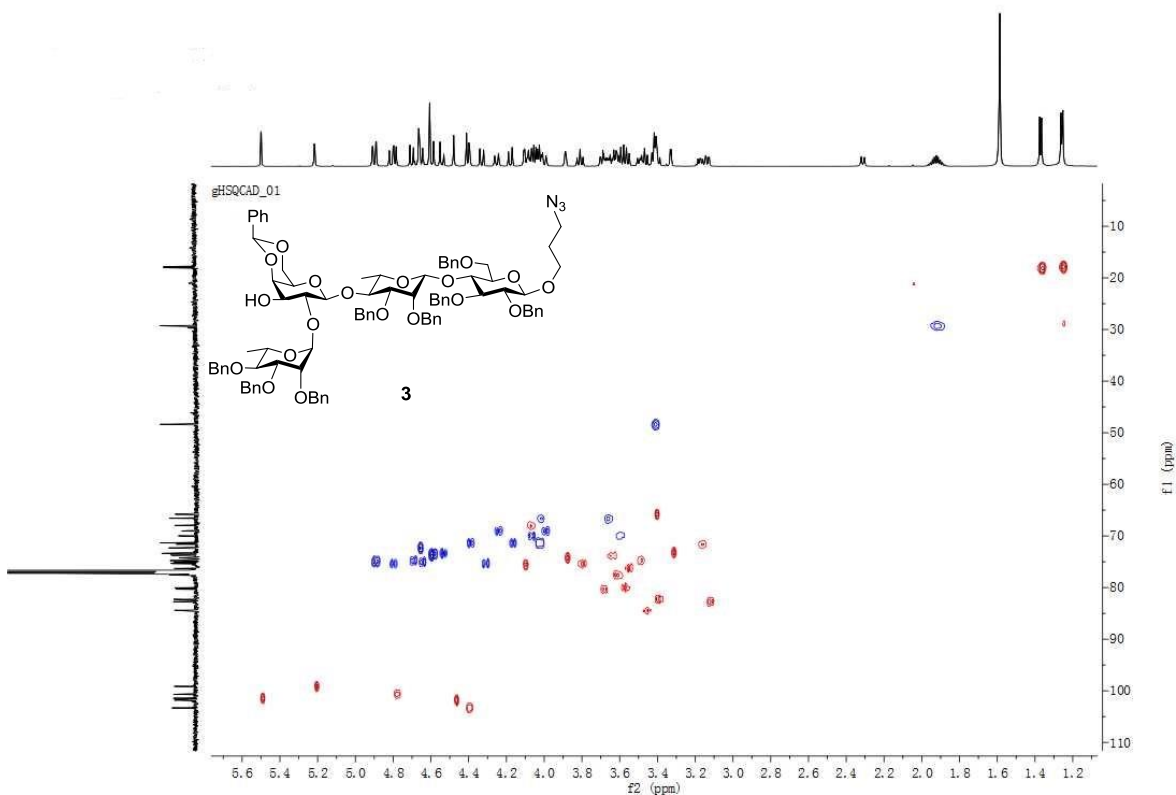

gHSQC NMR spectrum of compound **3** (600 MHz, CDCl<sub>3</sub>, 25 °C)

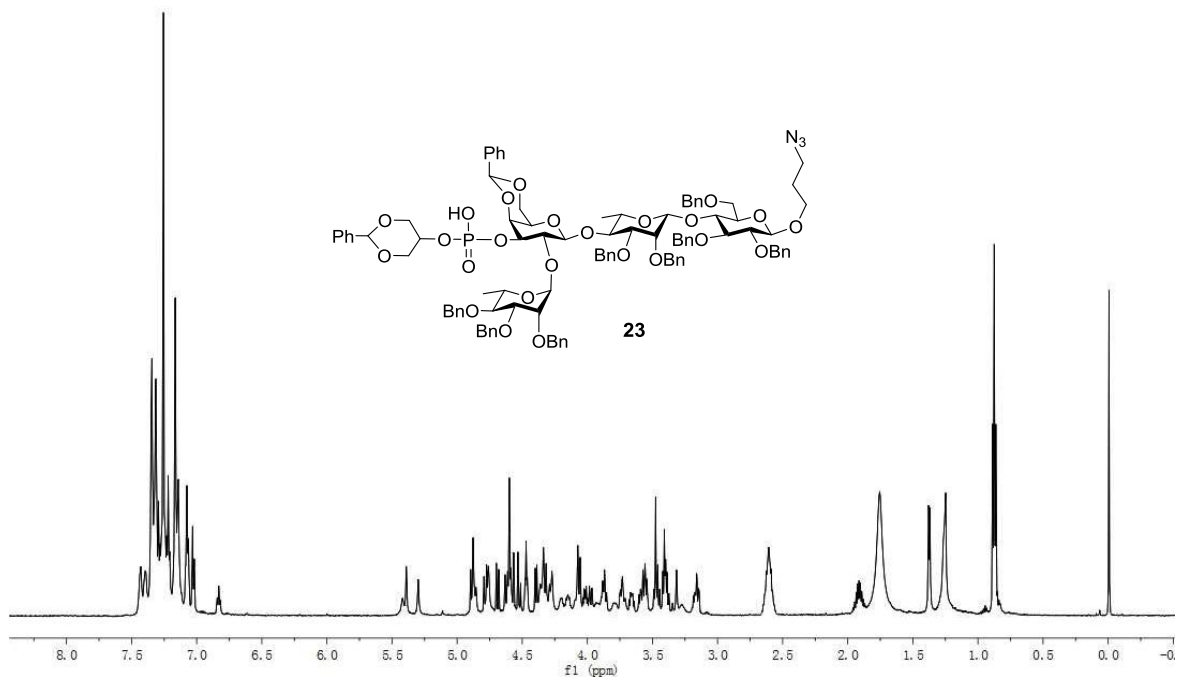

$^1\text{H}$  NMR spectrum of compound **23** (600 MHz,  $\text{CDCl}_3$ , 25 °C) as  $\text{Et}_3\text{N}$  salt

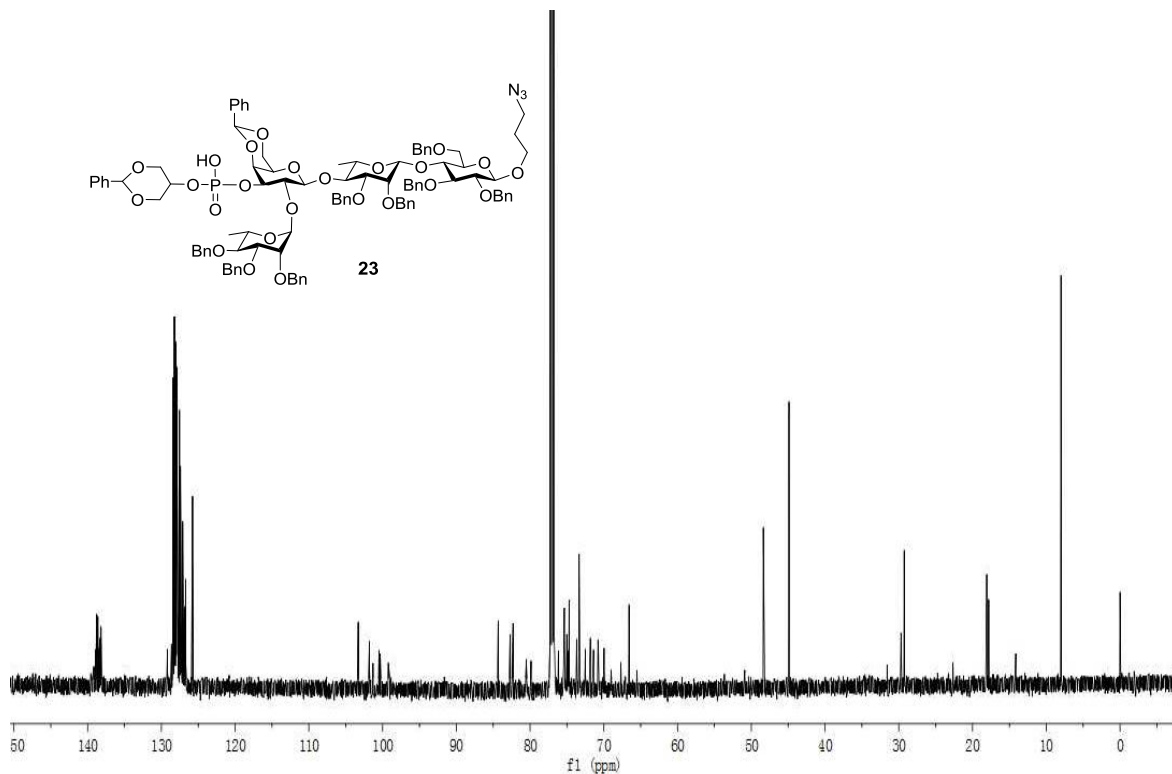

$^{13}\text{C}$  NMR spectrum of compound **23** (150 MHz,  $\text{CDCl}_3$ , 25 °C)

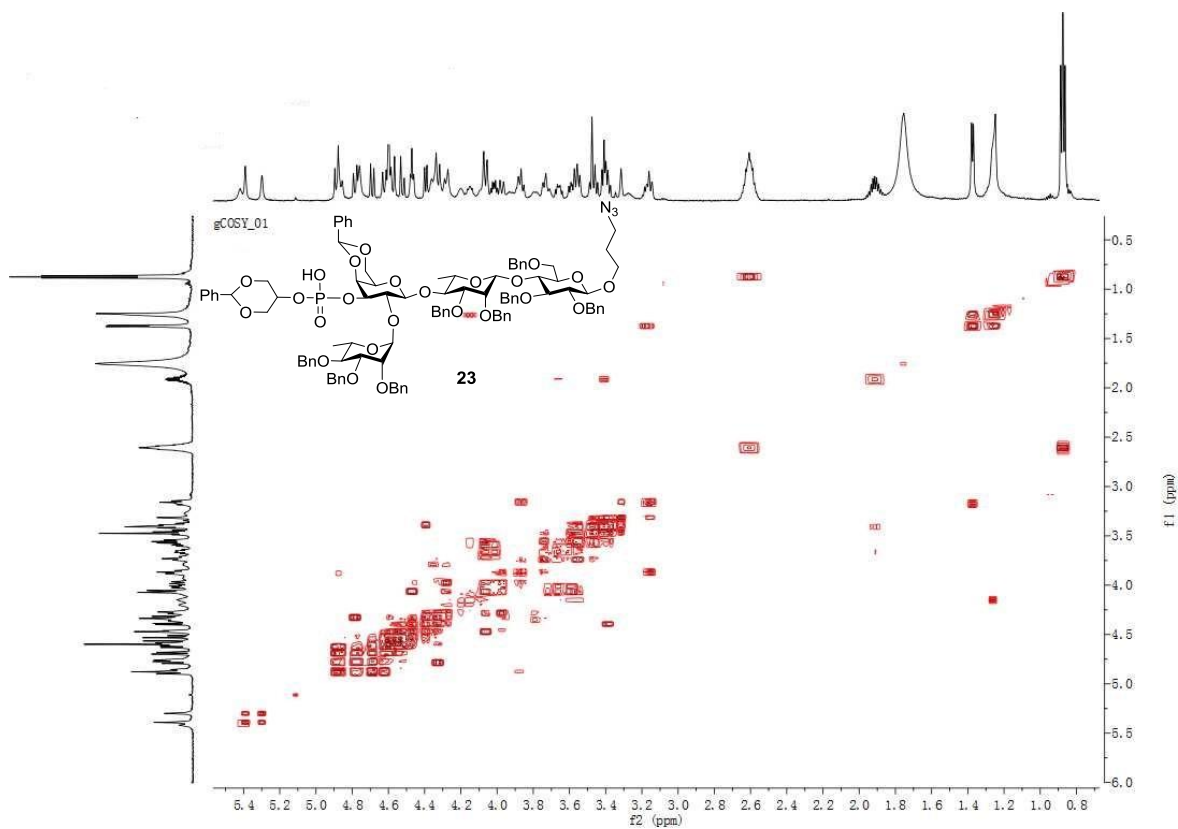

gCOSY NMR spectrum of compound **23** (600 MHz, CDCl<sub>3</sub>, 25 °C)

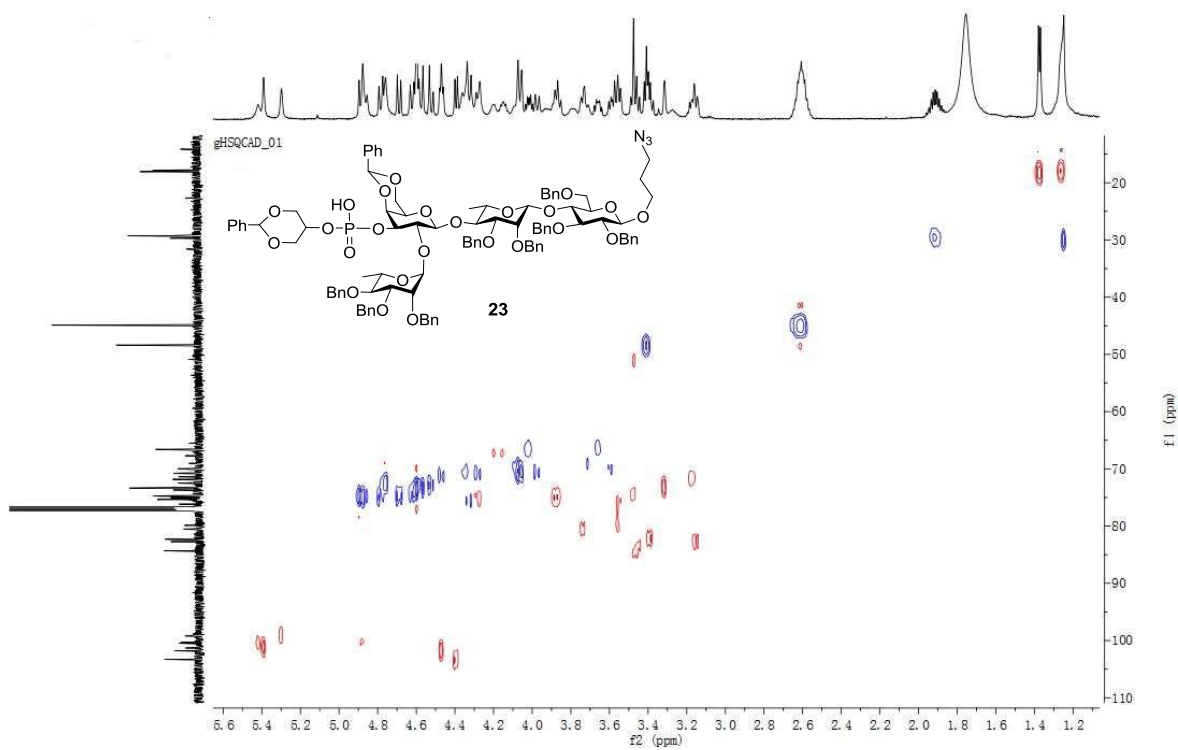

gHSQC NMR spectrum of compound **23** (600 MHz, CDCl<sub>3</sub>, 25 °C)

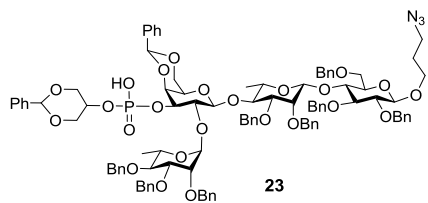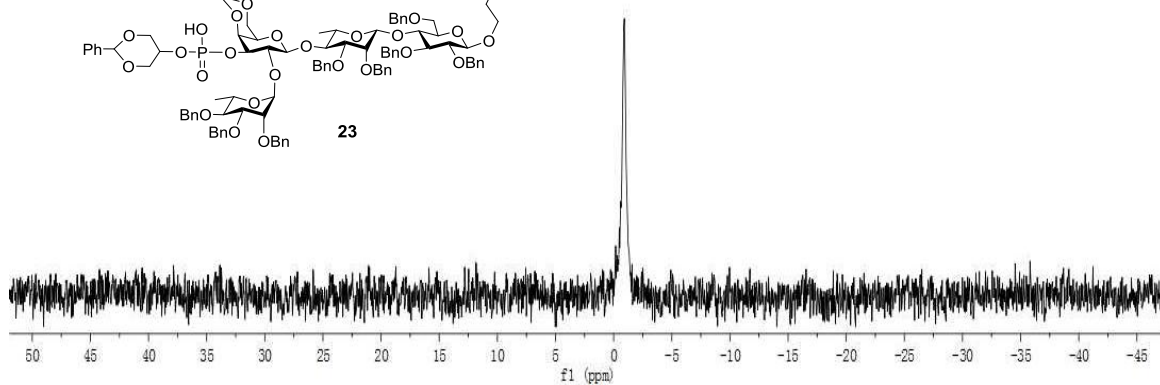

<sup>31</sup>P NMR spectrum of compound **23** (240 MHz, CDCl<sub>3</sub>, 25 °C)

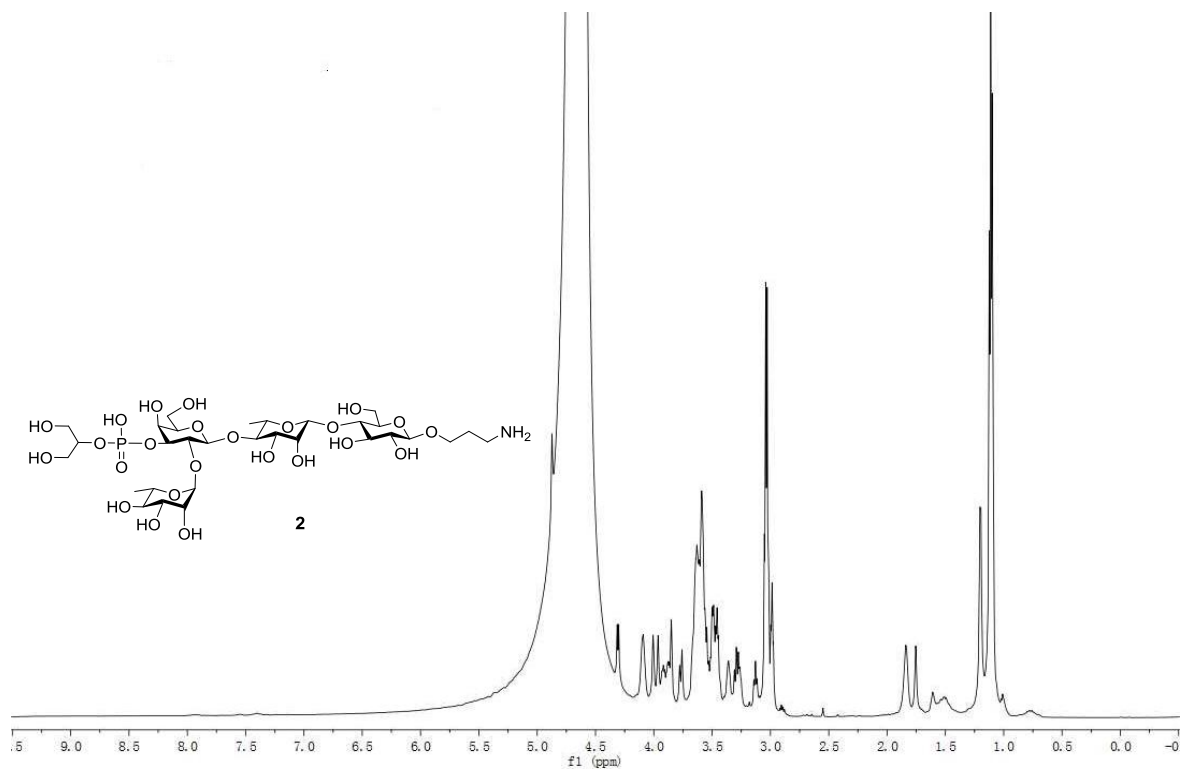

<sup>1</sup>H NMR spectrum of compound **2** (600 MHz, D<sub>2</sub>O, 25 °C) as Et<sub>3</sub>N salt

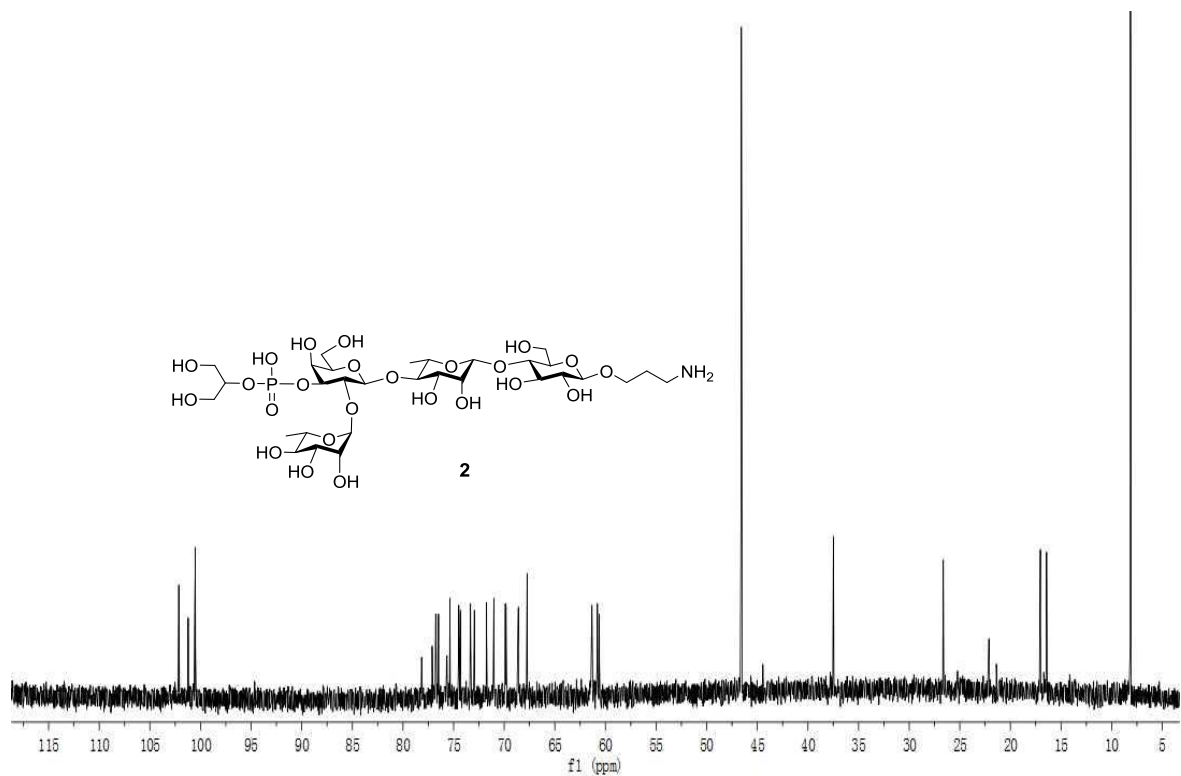

<sup>13</sup>C NMR spectrum of compound **2** (150 MHz, D<sub>2</sub>O, 25 °C)



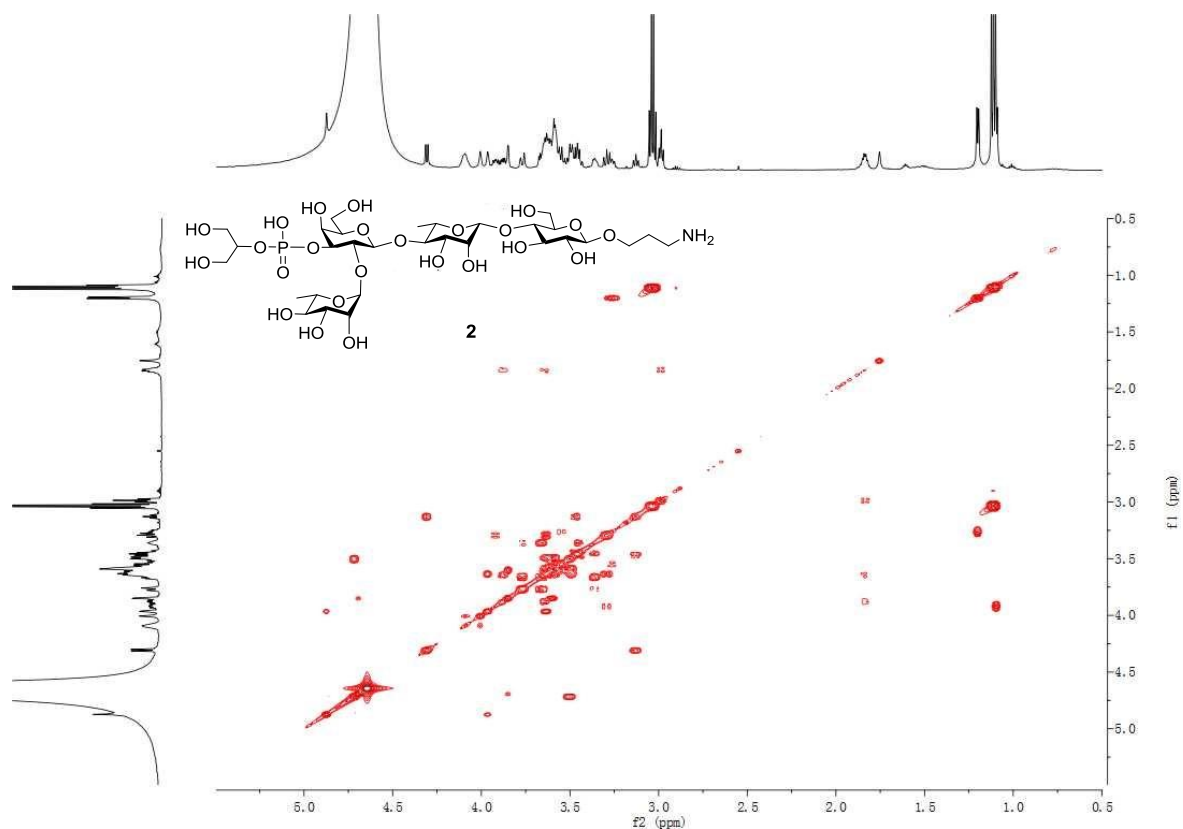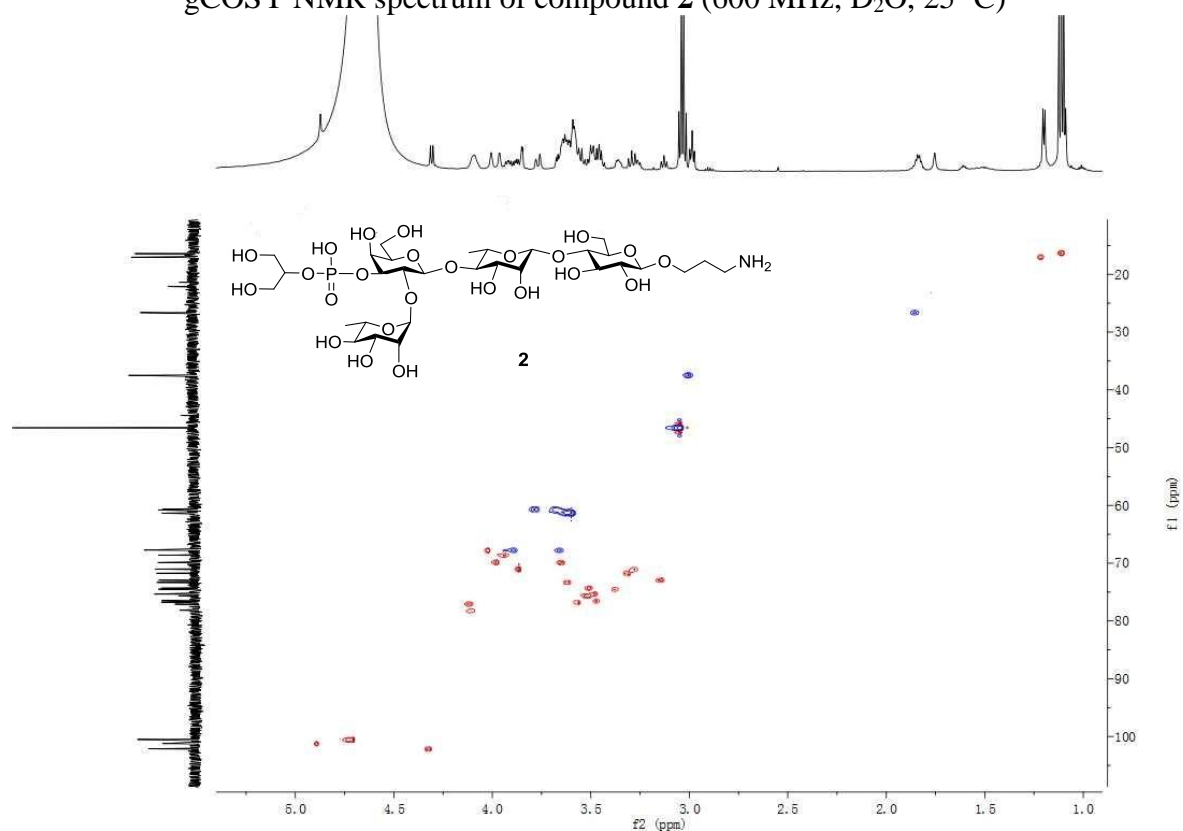

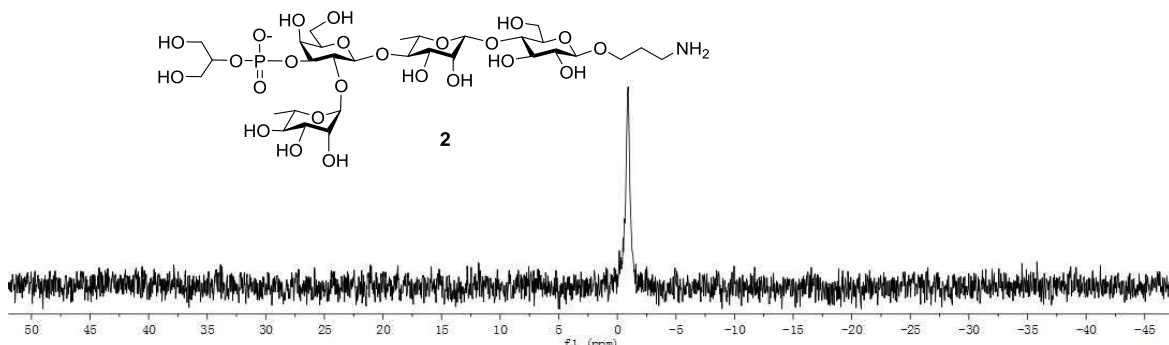

$^{31}\text{P}$  NMR spectrum of compound 2 (243 MHz,  $\text{D}_2\text{O}$ , 25 °C)

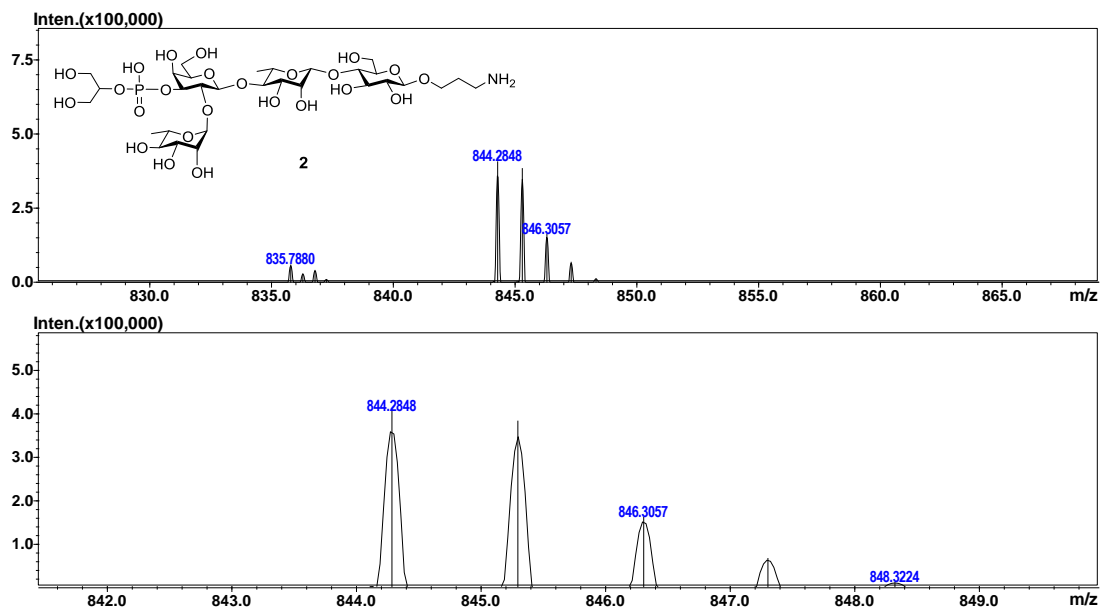

ESI-TOF HRMS spectrum of compound 2
